# Supplementary material for: Cubozoan genome illuminates functional diversification of opsins and photoreceptor evolution
Source: PubMed Central journal article supplement (PMC5155618; doi:10.1038/srep11885), 2015-07-08
Supplement: srep11885-s2.pdf [file srep11885-s2.pdf]

**Supplementary information:**

**Cubozoan genome illuminates functional diversification of opsins and photoreceptor evolution**

**Michaela Liegertová<sup>1a</sup>, Jiří Pergner<sup>1a</sup>, Iryna Kozmiková<sup>1</sup>, Peter Fabian<sup>1</sup>, Antonio R. Pombinho<sup>2</sup>, Hynek Strnad<sup>3</sup>, Jan Pačes<sup>3</sup>, Čestmír Vlček<sup>3</sup>, Petr Bartůněk<sup>2</sup> and Zbyněk Kozmik<sup>1\*</sup>**

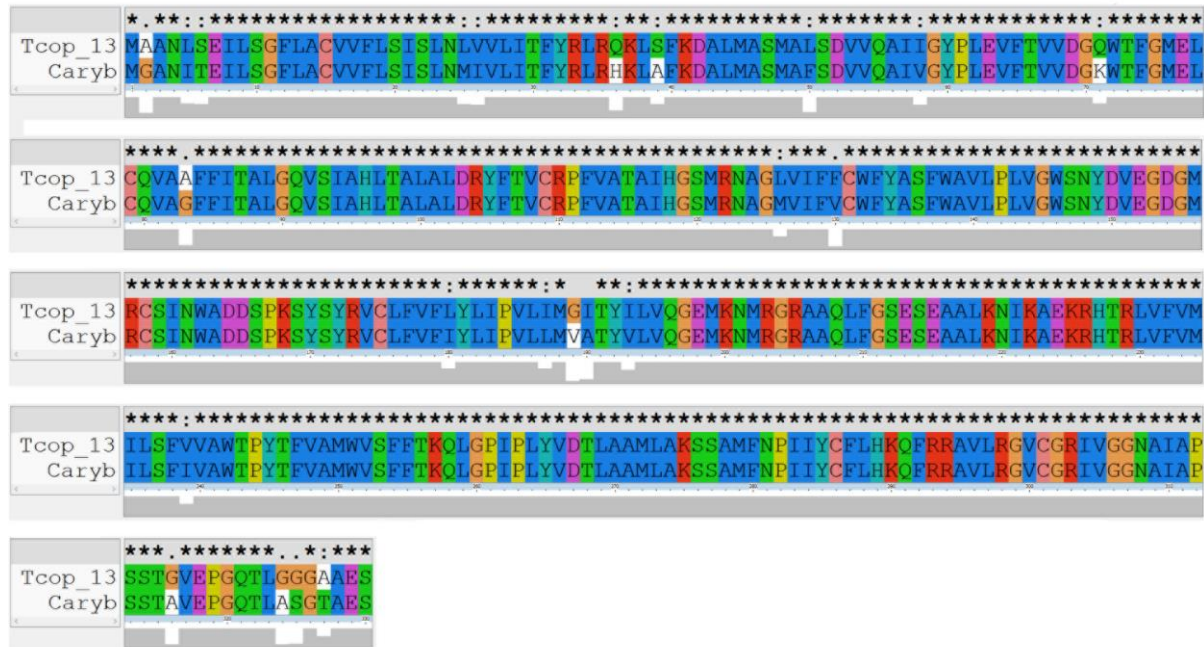

**Figure S1 - Pairwise sequence alignment of Tcop13 and *Carybdea rastonii* opsin**

Alignment showing homology between opsins, Tcop13 and Caryb, from two cubozoan species *Tripedalia cystophora* and *Carybdea rastonii*. Calculated sequence identity 93 %.

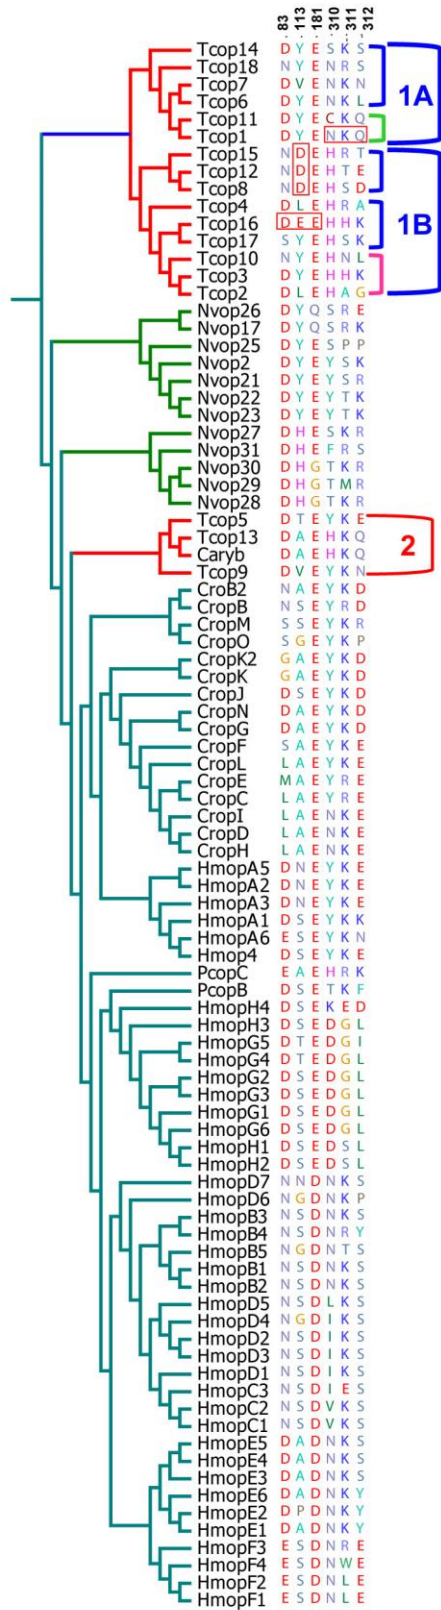

Figure S2 – Comparison of counterion and tripeptide diversity within cnidopsins

Partial sequence alignment of amino acid residues at three potential counterion sites (bovine rhodopsin sites 83, 113, 181) and the G protein-binding tripeptide (bovine rhodopsin sites 310, 311, 312) within the cnidopsin branch. Interesting amino acid residues are highlighted by red box. Tcop – *Tripedalia cystophora* (Cubozoa); Nvop – *Nematostella vectensis* (Anthozoa); Crop – *Cladonema radiatum* (Hydrozoa); Hmop – *Hydra magnipapillata* (Hydrozoa); Caryb – *Carybdea rastonii* (Cubozoa).

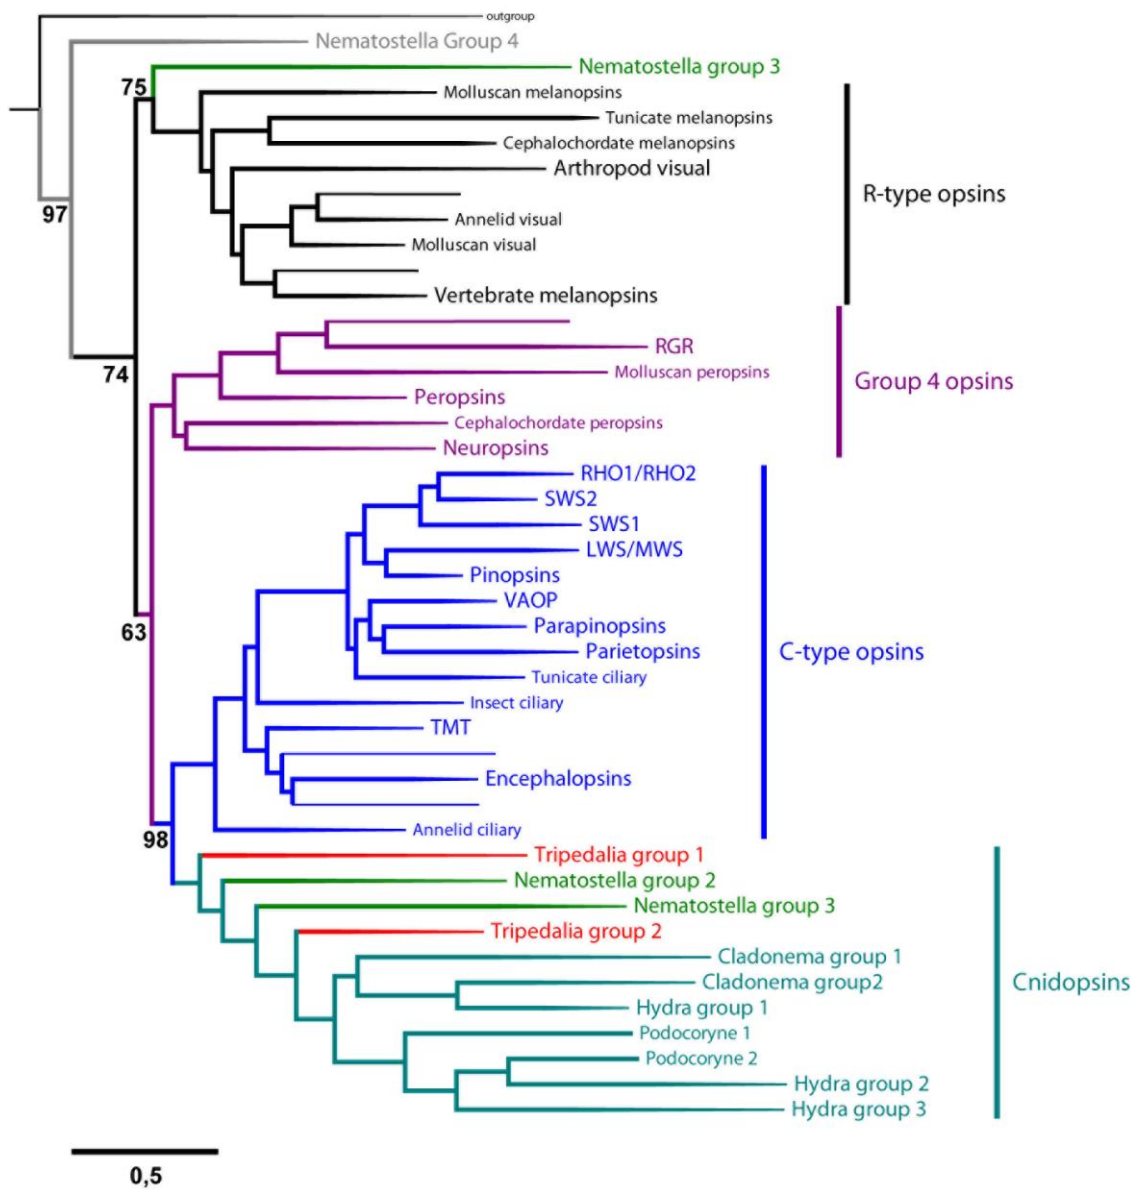

**Figure S3 – Maximum-likelihood tree of the opsin family**

The maximum-likelihood tree of 801 protein sequences with the branches collapsed into well-supported clades where possible. Approximate Likelihood-Ratio Test (aLRT) branch support values (%) are shown for major groups. The four major opsin clades have been labeled. R-type opsin group: arthropod visual pigments (M/LWS, SWS); annelid and molluscan visual pigments; vertebrate

melanopsins; uncharacterized tunicate, cephalochordate and molluscan opsins. Group 4 opsins: neuropsins; peropsins; RGR and uncharacterized cephalochordate and molluscan peropsins. C-type opsin group: vertebrate visual pigments (Rh1, Rh2, SWS1, SWS2, M/LWS); pinopsins; parapinopsins; vertebrate ancient opsins (VAOP); parietal opsins; teleost multiple tissue opsins (TMTs); encephalopsins; tunicate ciliary opsins; ptersopsins and insect ciliary opsins; uncharacterized annelid ciliary opsins. Cnidopsins: cnidarian opsins including representatives from hydrozoans, anthozoans and cubozoans. Nematostella group 4 and 1 are novel cnidarian opsin subfamilies, which do not cluster within the cnidopsin group.

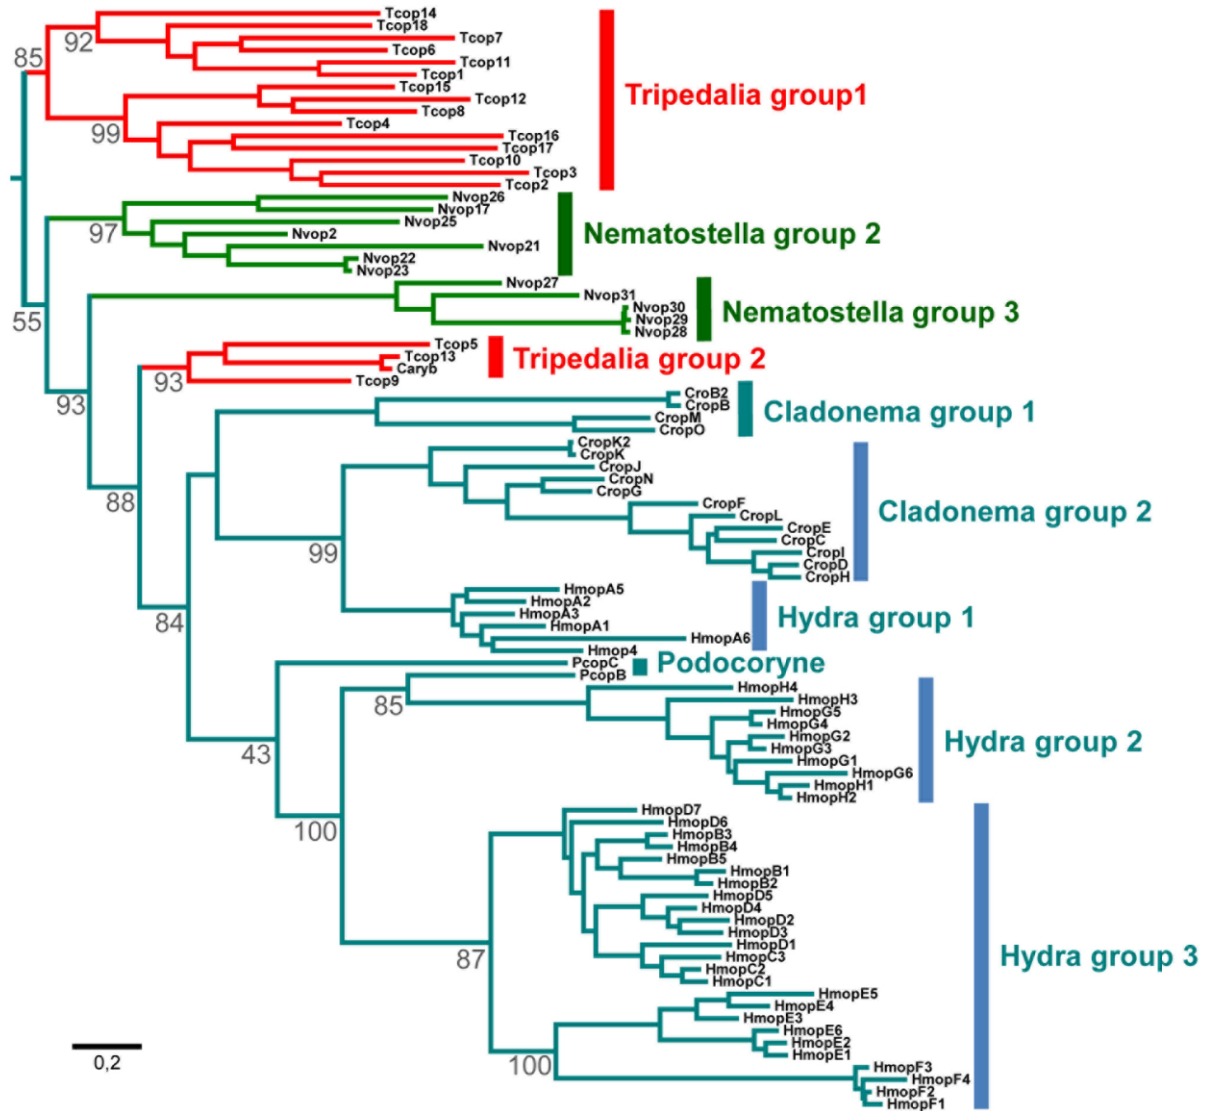

**Figure S4 – Zoom into the cnidopsin branch of the opsin family maximum-likelihood tree**

The major cnidopsin clades have been labeled. Approximate Likelihood-Ratio Test (aLRT) branch support values (%) are shown for major groups. Tcop – *Tripedalia cystophora* (Cubozoa); Nvop – *Nematostella vectensis* (Anthozoa); Crop – *Cladonema radiatum* (Hydrozoa); Hmop – *Hydra magnipapillata* (Hydrozoa); Caryb – *Carybdea rastonii*.

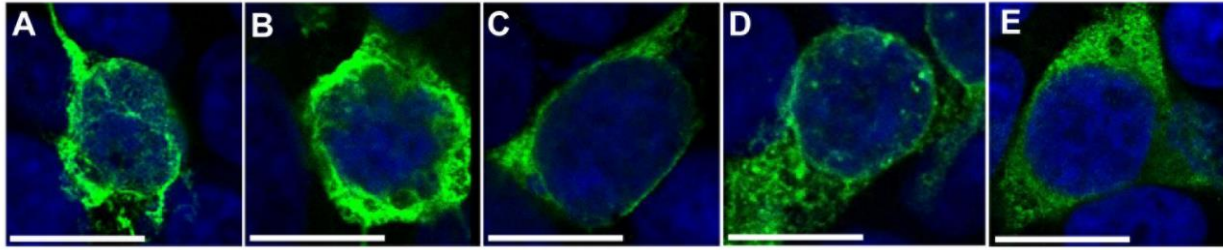

**Figure S5 – Expression of recombinant *T. cystophora* opsins in GloSensor™ cAMP HEK293 cells**

**A-D)** Opsins tagged with 1D4 tag were expressed in GloSensor™ cAMP HEK293 cells (Promega) and stained as described in Materials and Methods (blue – DAPI and green – 1D4 tag). Opsin signals were detected on the cell membrane. **A)** Tcop5. **B)** Tcop13. **C)** Tcop18. **D)** Tcop9. **E)** *Oryzias latipes* rhodopsin used as control. (Scale bars: 10  $\mu$ m)



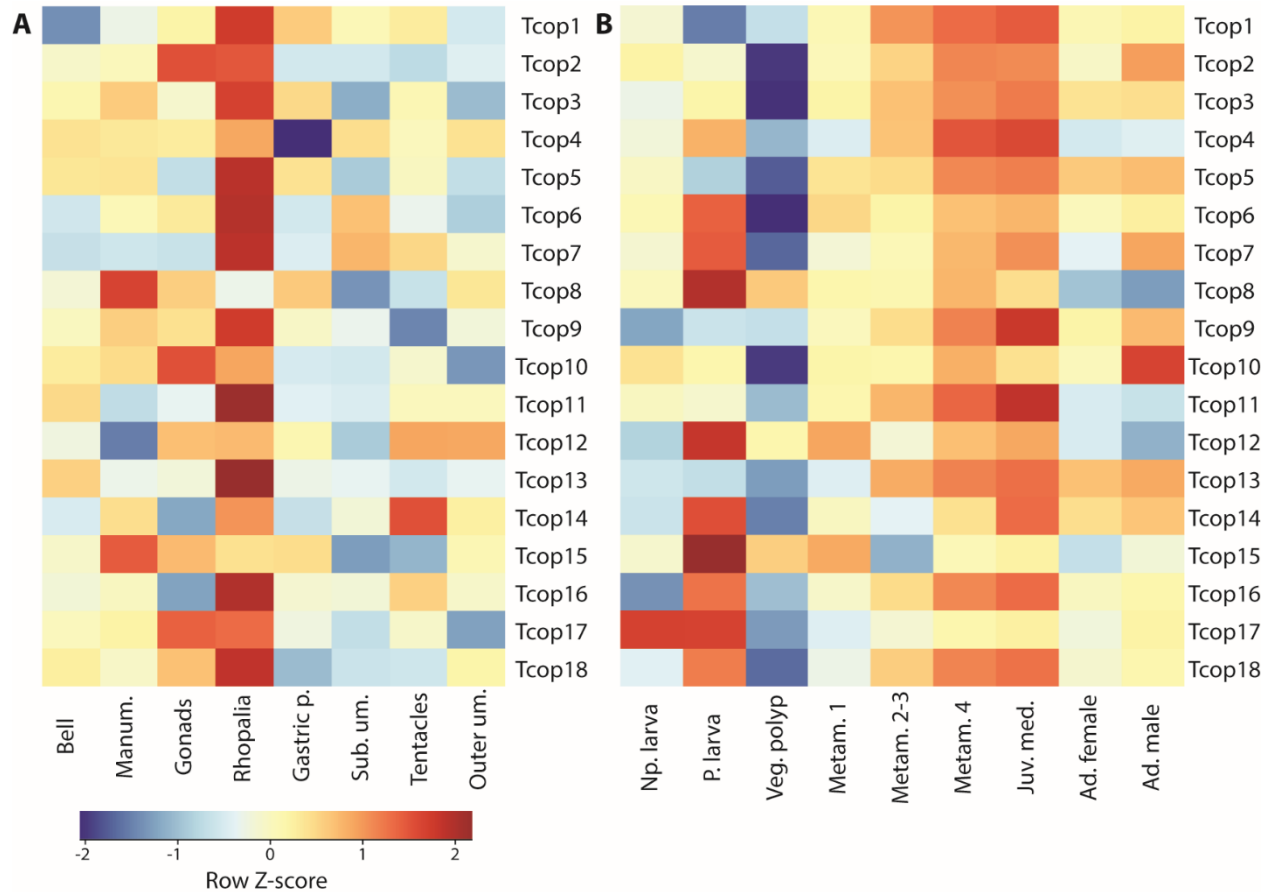

**Figure S6 – mRNA expression levels of individual *T. cystophora* opsins in dissected body parts of adult jellyfish and life stages displayed as Z-score heat map**

Opsin expression was normalized to expression of housekeeping gene Rpl32 and plotted as Z-score heat map (as described in Materials and methods). A – qRT-PCR results of Tcops expression in dissected *Tripedalia* body parts. Schematic representation of dissected body parts can be found in Fig. 4. Manum. – manumbrium, Gastric p. - gastric pouch, bell, Sub. Um. – sub-umbrella, Outer um. - outer umbrella. B – qRT-PCR results of Tcops expression during *Tripedalia* life cycle. Schematic representation of life stages can be found in Fig. 5. Np. Larva - non-pigmented larva, P. larva - pigmented larva, Veg. polyp - vegetative polyp, Metam. 1, Metam. 2-3, Metam. 4 - three polyp-to-medusa metamorphosing stages, Juv. med. - juvenile medusa, Ad. female - adult female and Ad. male - adult male.



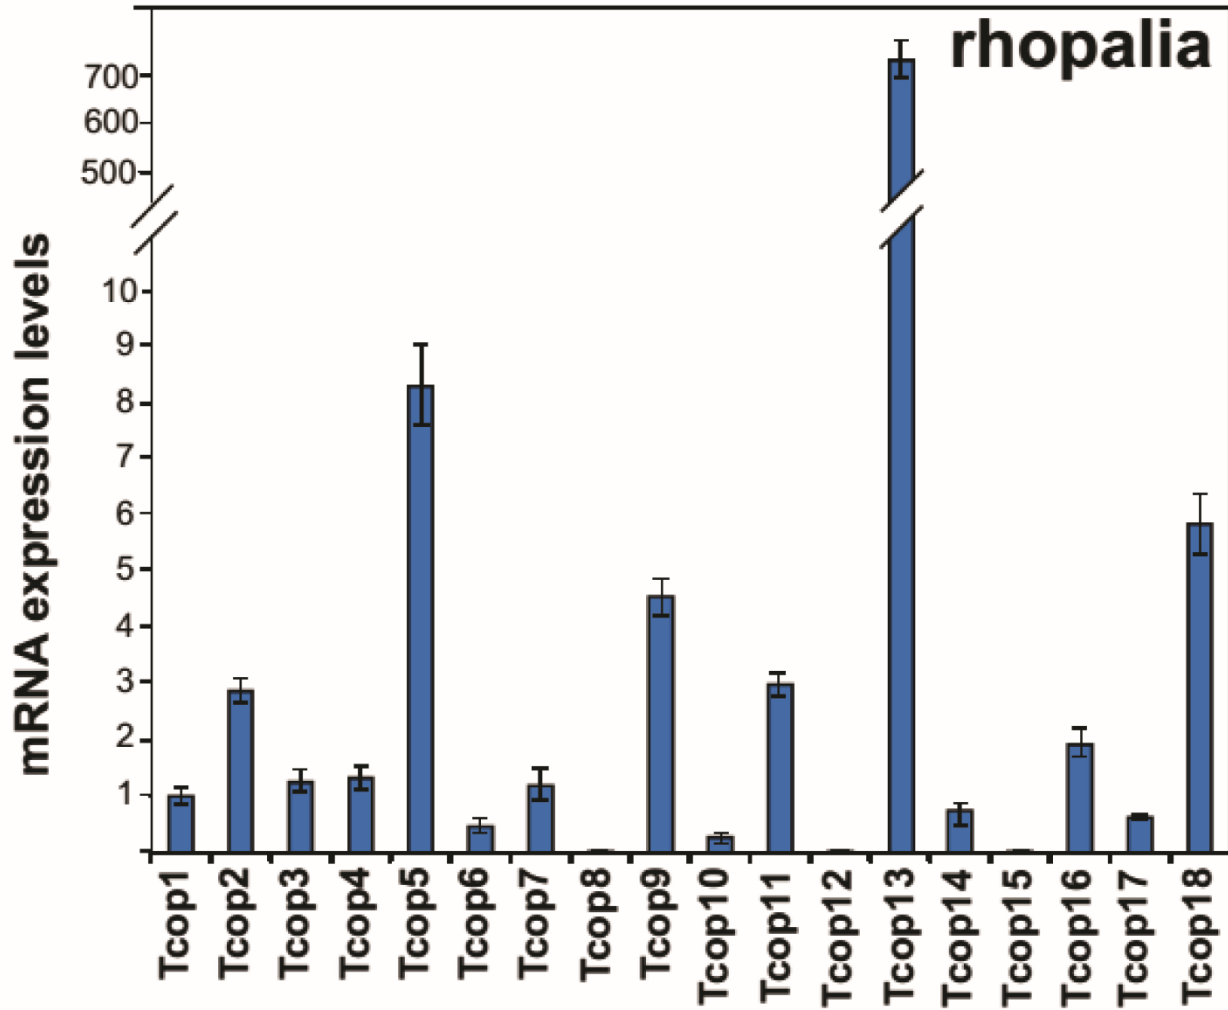

Figure S7 – mRNA expression levels of opsins in rhopalium and gonads

Comparison of all *T. cystophora* opsin mRNA levels, measured by real-time PCR in rhopalia.

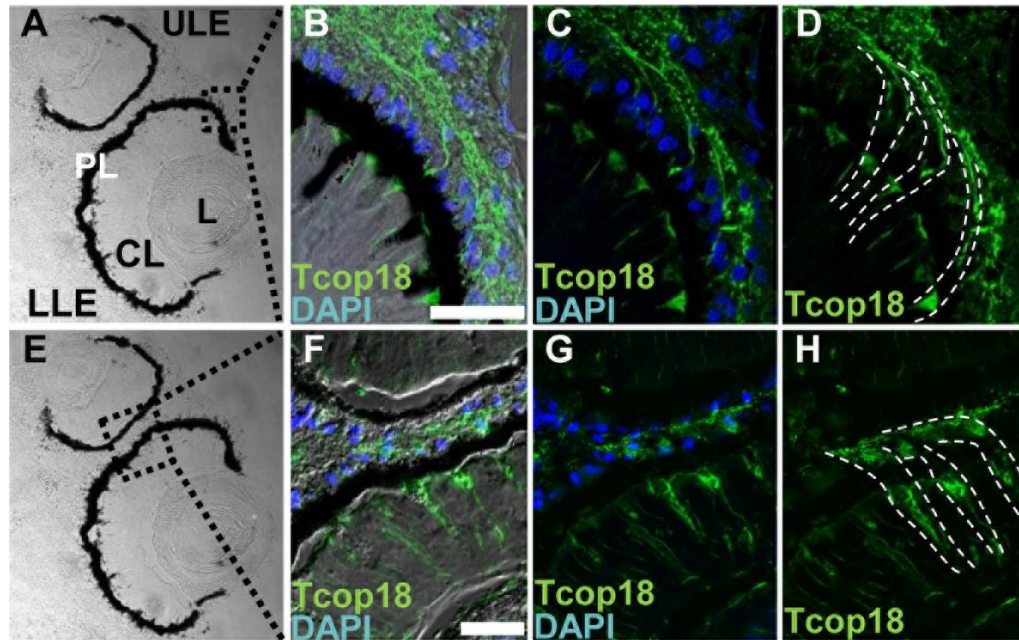

**Figure S8 – Details of type-A photoreceptor cells in lens eye retinas**

**A-H)** Confocal images of immunohistochemical staining for Tcop18 (green) in the examined parts of lens eye retinas. **D, H)** Shapes of type-A photoreceptor cells are indicated with a dotted white line.

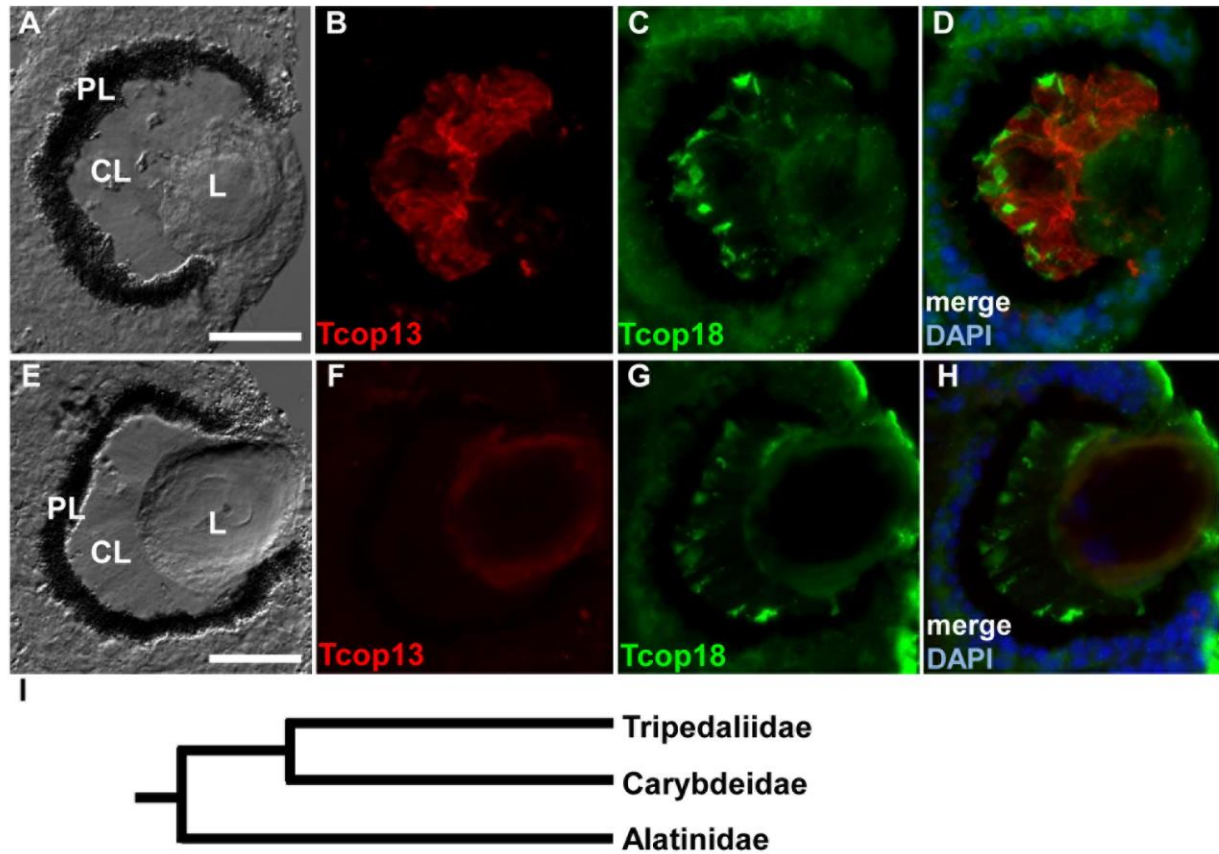

**Figure S9 – Comparison of Tcop13 and Tcop18 expression in the retinas of lens eye between Tripedaliidae and Alatinidae**

**A-D)** Confocal images of immunohistochemical staining for Tcop13 (red), Tcop18 (green) and DAPI (blue) in the developing LLE of juvenile *T. cystophora* medusa. **E-H)** Developing LLE of juvenile *Alatina marsupialis* medusa. **F)** Absence of Tcop13 signal in the retina. **I)** Phylogenetic relationship between Carybdeid families. (Scale bars: 20  $\mu$ m)

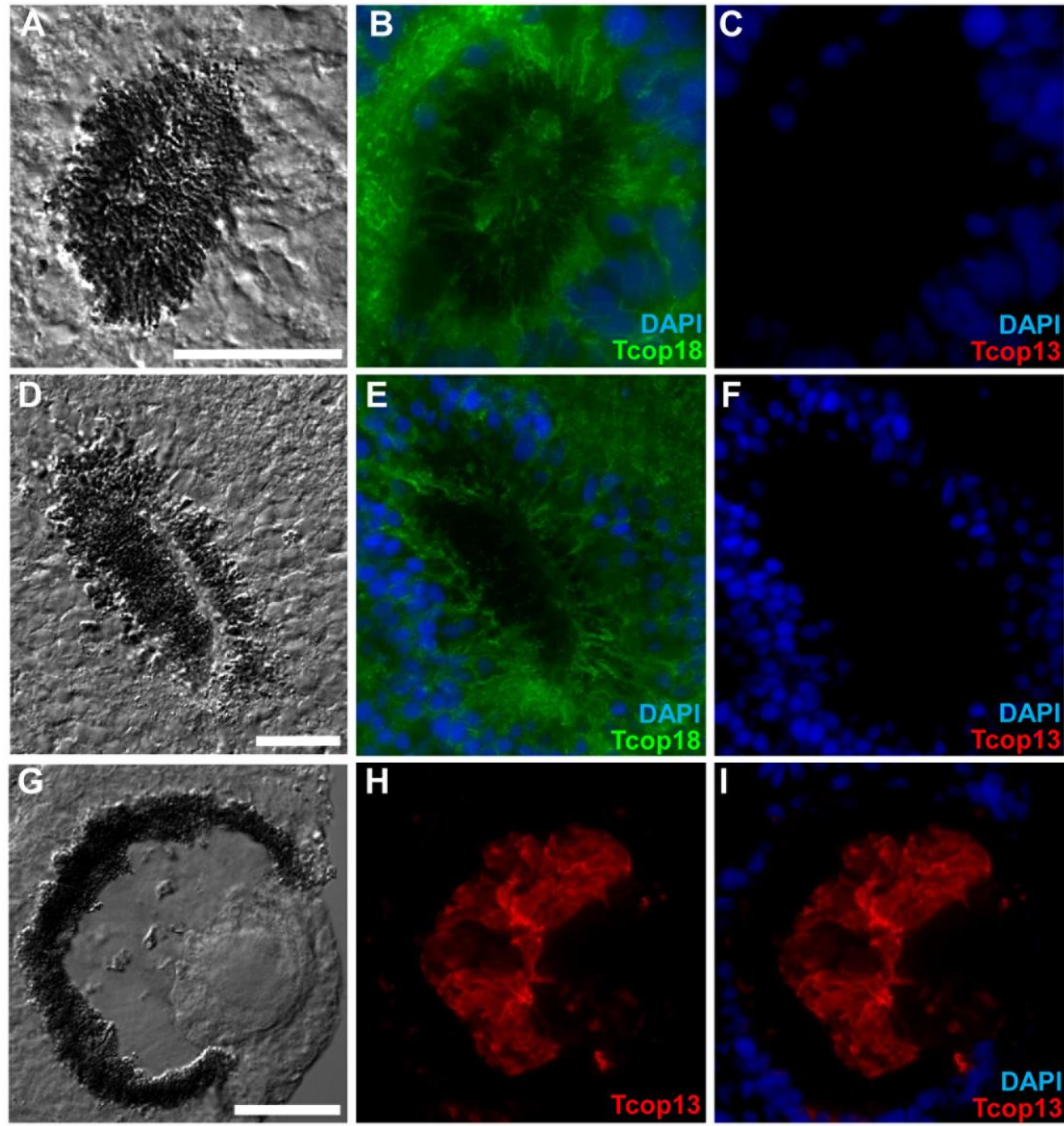

**Figure S10 – Expression pattern of Tcop18 in the pit and slit ocelli of *T. cystophora***

**A-D)** Confocal images of pit and slit eyes. **A)** Pit eye as seen in bright field. **B)** Immunohistochemical staining for Tcop18 (green) and DAPI (blue). **C)** Staining for Tcop13 (green) and DAPI (blue). Signal for Tcop13 was not present in the retina. **D)** Slit eye as seen in bright field. **E)** Immunohistochemical staining for Tcop18 (green) and DAPI (blue). **F)** Staining for Tcop13 (green) and DAPI (blue). Signal for Tcop13 was not present in the retina. Both ocelli types seem to be formed exclusively of type-A photoreceptors. (Scale bars: 20  $\mu$ m) **G)** LLE as seen in brightfield. **H-I)** Staining for Tcop13 (red) and DAPI (blue); used as positive control. (Scale bars: 20  $\mu$ m)

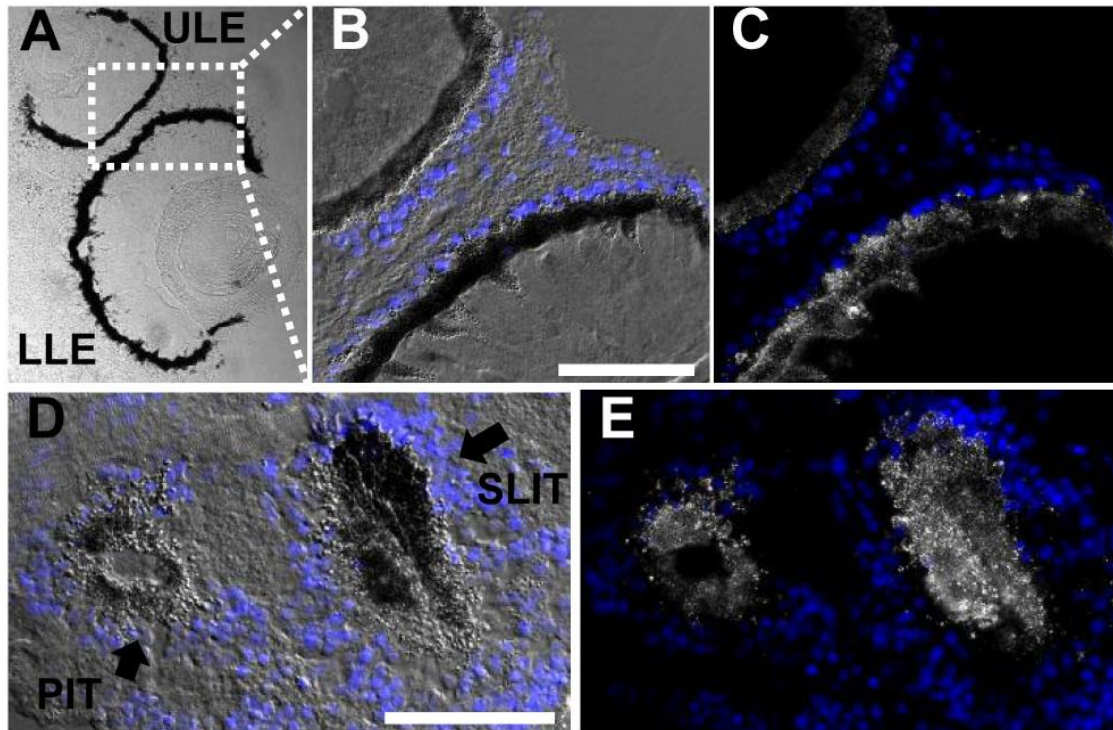

**Figure S11 – Types of shading pigment granules in the photoreceptors**

**A-C)** Detail of the pigmented areas of ULE and LLE retinas. **A-B)** In bright field, both types of pigment granules appear dark. **C)** The same detail in polarized light. Part of the granules alter the plane of polarization and appear white. **D-E)** Both types of pigment granules are present in the retinas of pit and slit eyes. **D)** Pit and slit eyes as seen in bright field. **E)** Pit and slit eyes as seen in polarized light. DAPI (blue). (Scale bars: 50  $\mu\text{m}$ )

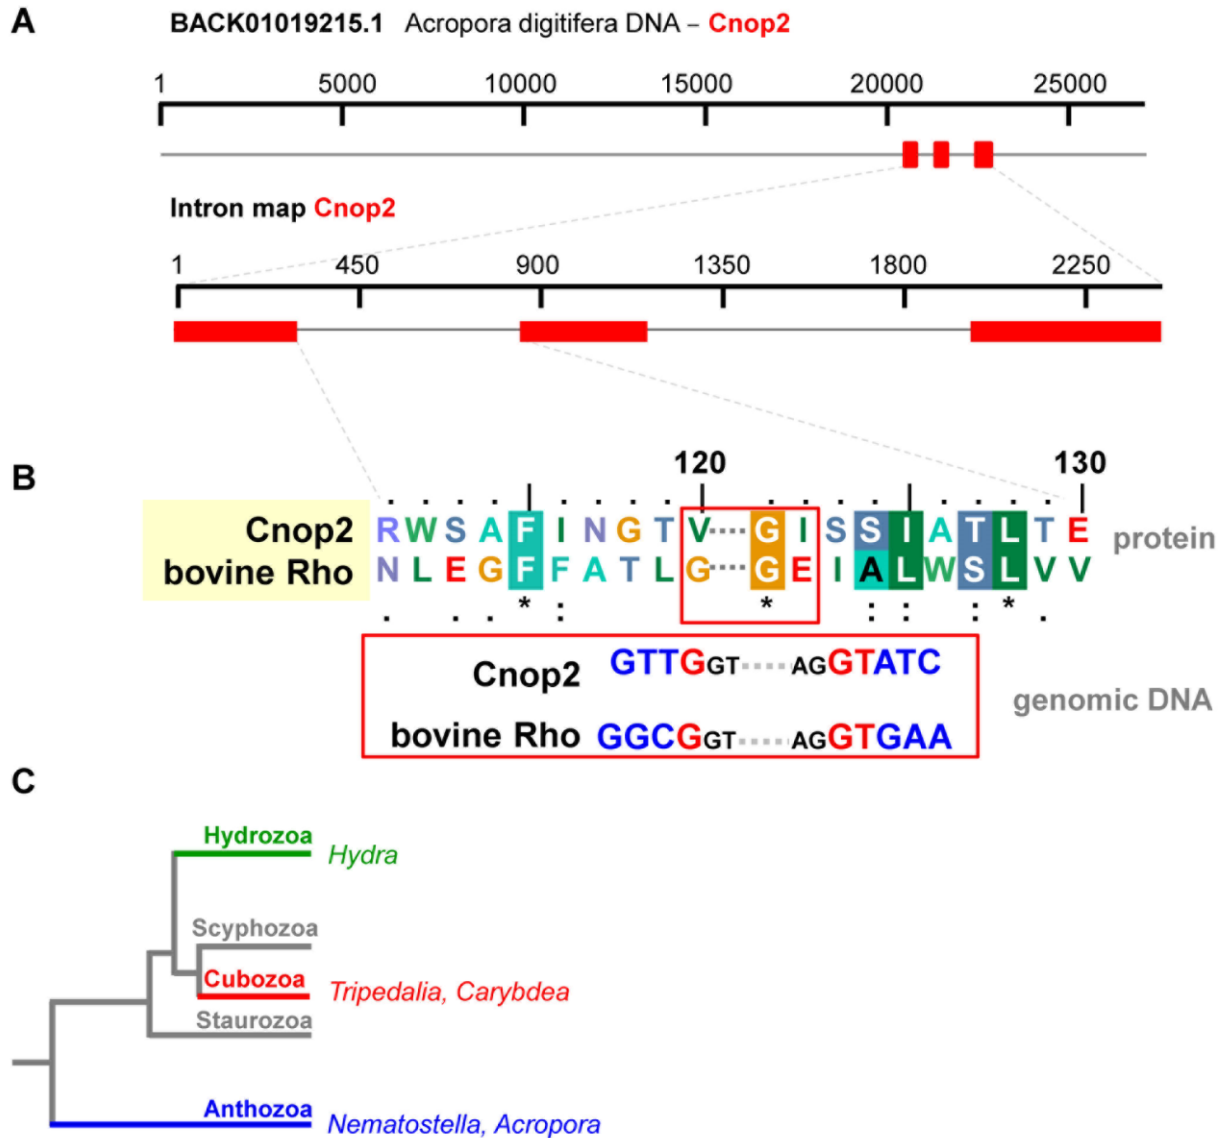

**Figure S12 –Intron characterization of Cnop2 opsin from anthozoan *Acropora digitifera***

**A)** Cnop2 genomic localization and intron map. **B)** Partial protein alignment of bovine rhodopsin and Cnop2. Positions of the first intron in both genes are highlighted by red line. Introns from both species match in position and in phase (as shown on the genomic DNA). **C)** Phylogenetic relations within cnidaria.



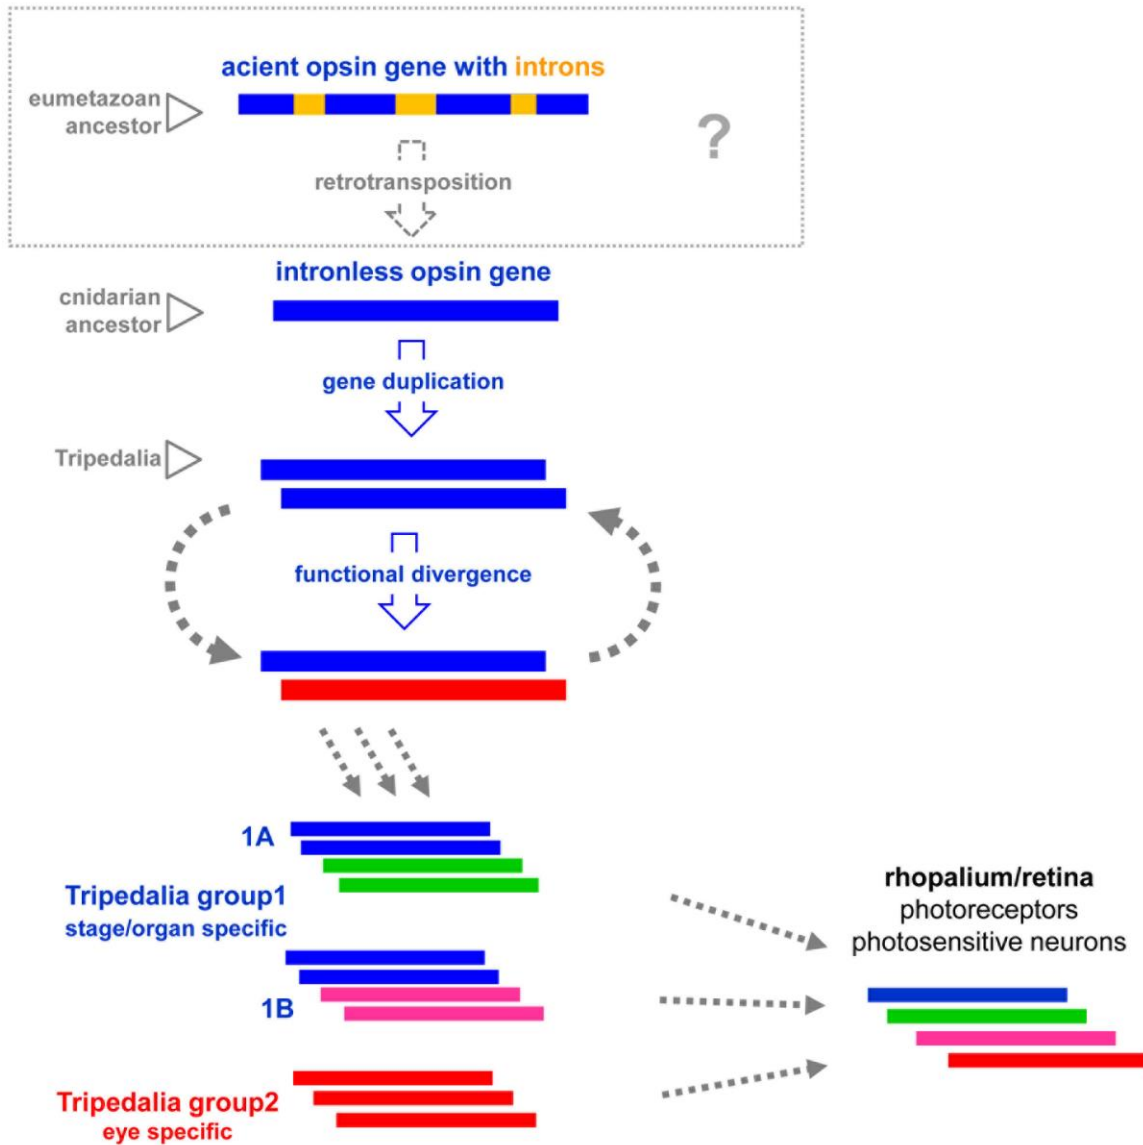

**Figure S13 - Possible scenario for intron-less opsin emergence and subsequent expansion in *T. cystophora***

For further information see discussion.

**Additional file – *T. cystophora* phototaxis test movie**

Movie showing response of living *T.cystophora* medusa to light stimulus without and with presence of Gs cascade specific inhibitor. MPG movie can be viewed in any video software.

| Gene   | reverse primers for 5' end direction walking |
|--------|----------------------------------------------|
| Tcop1  | CCATTACCATCAGGAAGACCAACAAGG                  |
| Tcop2  | TCGATTATCTCACGTGATACCCACTTGG                 |
| Tcop3  | GGTGCACAACCTACATGTTGACTTTCAG                 |
| Tcop4  | GGACATACTATTCCAATCACCTGCTTTCC                |
| Tcop5  | CCAAAGTGACTCTTGGAGCGATGTC                    |
| Tcop6  | CCAACGACGATCTGGATTGCCAATTAATG                |
| Tcop7  | CACCTGATTCTAGTAGGATGCAGGCA                   |
| Tcop8  | CTAGGGCTGCATTGGATCCAAACTTTG                  |
| Tcop9  | AGGTCGTCCATAAAGAAAGAATGGCAT                  |
| Tcop10 | CAGATGCGAAGTTTGTCTGGATATCA                   |
| Tcop11 | AAGCTGCTTGGAGGCTGATGAGATT                    |
| Tcop12 | ACTGACTAAATTGCTGTCAATGGTCACG                 |
| Tcop13 | ATGGCGGCTAACTTGTCTGAAATACTTTC                |
| Tcop14 | CCCTCTGTAGAATAACTTGAGAGTCCAGTA               |
| Tcop15 | CTACATTGCCTGTGACGCTCTCATG                    |
| Tcop16 | GCCTCTTTATTTAGCTCTAACTTATGATGC               |
| Tcop17 | CGGATATTTACATGACGTCGCATCATCC                 |

| Gene   | forward primers for 3' end direction walking |
|--------|----------------------------------------------|
| Tcop1  | CACAAAGTGCAAGAGAAATCGAGAGACA                 |
| Tcop2  | CCCAGTGCATACTGTCTTATATACTCG                  |
| Tcop3  | ACCTACAAGAGTTCTCTCCTATCTGAAGG                |
| Tcop4  | CGAACCAGAACAGCTGTCGTAATCTT                   |
| Tcop5  | TCATGTTCTACATCAGAAGCGAATTGACG                |
| Tcop6  | TGTTACCCACTCTCAGCATATTCCA                    |
| Tcop7  | CAACTTCTAAGTAACAACAGGACTCGGT                 |
| Tcop8  | CCTCTCAACATTGTATCATGCTTTCAGC                 |
| Tcop9  | GCACTCGACCGTTATATGACAGTGT                    |
| Tcop10 | GGGATCAGCAGAGATTAAGGATGCTACT                 |
| Tcop11 | TACGATGGCACAGTGATGACAGCA                     |
| Tcop12 | ATCCTCGGTCTGCTATCTACCTGTTG                   |
| Tcop13 | GCAGTGGACATTTGGTATGGAGCTA                    |
| Tcop14 | CGCTATCAATATCGTCATCTTTTGCCAC                 |
| Tcop17 | AGTTATTGCCTATCGCCAGTGGAAG                    |

|        | anti-Tcop13 antibody preparation  |         |
|--------|-----------------------------------|---------|
| Tcop13 | CGCGGATCCAACCCGATCATTTACTGCTTCCTT | forward |
|        | CCCAAGCTTTTAACTCTCTGCAGCCCCTC     | reverse |

| Gene/Product size | RT-qPCR primers: |                        |         |
|-------------------|------------------|------------------------|---------|
| Tcop1/212 bp      | 1231A            | TATGCCCGTTGTTGCCTATC   | forward |
|                   | 1231B            | GGTGACATTTTGGCGATTGAT  | reverse |
| Tcop2/119 bp      | 1232A            | AGTTGCTGCCAGATTGTGTT   | forward |
|                   | 1232B            | TTGTAGTGGGCGAGTTCCTGT  | reverse |
| Tcop3/217 bp      | 1233A            | GACCCGCTCGATGTGTCTTAC  | forward |
|                   | 1233B            | AGGGAAGCCAACAGAACACAA  | reverse |
| Tcop4/228 bp      | 1234A            | CAGTCTCTTCGGTGGCTCACT  | forward |
|                   | 1234B            | TCCAATCACCTGCTTTCCAGT  | reverse |
| Tcop5/205 bp      | 1235A            | TTGACGCGCTCTACTTTGTCA  | forward |
|                   | 1235B            | GACATAAGCATCACGGCAACA  | reverse |
| Tcop6/170 bp      | 1236A            | GCACGGGTCAAACCTCTCAAAC | forward |
|                   | 1236B            | ATTCTGCTATTGGGCTCACGA  | reverse |
| Tcop7/155 bp      | 1237A            | TTGCTGGTCTTCCTCATTGGT  | forward |
|                   | 1237B            | GGAAGCAGCAAACAAGAATGG  | reverse |
| Tcop8/194 bp      | 1238A            | TGCATATTAGGCGTCACAACG  | forward |
|                   | 1238B            | AATTGGGTTTAATGGGCCTTG  | reverse |
| Tcop9/150 bp      | 1239A            | ACCCAAGAAAAACCGAAAGGA  | forward |
|                   | 1239B            | CAGAGCAACGCACTTTCACAC  | reverse |
| Tcop10/227 bp     | 1240A            | CTTGGGCATCTGTTGATGGTT  | forward |
|                   | 1240B            | CAGCCATCGTAGCCAAATCTC  | reverse |
| Tcop11/211 bp     | 1241A            | ACCTGGCTATTCCGGAGATGGT | forward |
|                   | 1241B            | GTAGTGCTGCCAGACAAACC   | reverse |
| Tcop12/160 bp     | 1242A            | GCAACCTCTTGCATGTCACAA  | forward |
|                   | 1242B            | AAGCGATCAACTGCCAACAAT  | reverse |
| Tcop13/224 bp     | 1243A            | CTGCACAGCTGTTTGGTTCTG  | forward |
|                   | 1243B            | GAACATGGCTGAGGACTTTGC  | reverse |
| Tcop14/178 bp     | 1244A            | GACTGGTCTTGCCTTTGATCG  | forward |
|                   | 1244B            | GCTCACCTGGAGACCCTCTT   | reverse |
| Tcop15/238 bp     | 1245A            | GGCTGAAAATGCGAGAGAAGA  | forward |
|                   | 1245B            | ACCATAACCCCAATGATGCTG  | reverse |
| Tcop16/232 bp     | 1246A            | TATCCCGTCGCTGGAGTAAGA  | forward |
|                   | 1246B            | TTACCGCCAAAGCATACATCC  | reverse |
| Tcop17/193 bp     | 1247A            | TATGGTTTTTGCATGTC      | forward |
|                   | 1247B            | ACCATCCGAAGTAGGGAGGAA  | reverse |
| Tcop18/176 bp     | 1248A            | CCACTTTTGGGATCTCCACTG  | forward |
|                   | 1248B            | CGCTTCAAGGGAAGTACGATG  | reverse |
| Rpl32/146 bp      | DG6I             | CTTGAAGCGACGCCTAACTCT  | forward |
|                   | DG6J             | AATGGTTGTCCCCACGGTAAAG | reverse |

**Table 1 - Primers used for genome walking and RT-qPCR analysis**

List of primers used for genome walking and RT-qPCR analysis.

| SOURCE   | ID          | Major Lineage | Phylum   | Genus           | species      | common name | GB ACC#        |
|----------|-------------|---------------|----------|-----------------|--------------|-------------|----------------|
| Tpringle | >LWS.anoCar | C-type        | Chordata | Anolis          | carolinensis | lizard      | XP_003216922   |
| Tpringle | >LWS.galGal | C-type        | Chordata | Gallus          | gallus       | chicken     | NP_990740.1    |
| Tpringle | >LWS.gasAcu | C-type        | Chordata | Gasterosteus    | aculeatus    | stickleback | Genome         |
| Tpringle | >LWS.homSap | C-type        | Chordata | Homo            | sapiens      | human       | NM_000513      |
| Tpringle | >LWS.letJap | C-type        | Chordata | Lethenteron     | japonicum    | lamprey     | BAD17958.1     |
| Tpringle | >LWS.macEug | C-type        | Chordata | Macropus        | eugenii      | wallaby     | AAP37945.1     |
| UMBC     | >LWS.Macfas | C-type        | Chordata | Macaca          | fascicularis | macaque     | AAD40324.1     |
| Tpringle | >LWS.monDom | C-type        | Chordata | Monodelphis     | domesticus   | opossum     | ABC75816.1     |
| Tpringle | >LWS.neoFor | C-type        | Chordata | Neoceratodus    | forsteri     | lungfish    | ABS89280.1     |
| Tpringle | >LWS.ornAna | C-type        | Chordata | Ornithorhynchus | anatinus     | platypus    | NP_001121097.1 |
| Tpringle | >LWS.petMar | C-type        | Chordata | Petromyzon      | marinus      | lamprey     | ACB69762.1     |

|          |                |        |          |               |               |                       |                |
|----------|----------------|--------|----------|---------------|---------------|-----------------------|----------------|
| Tpringle | >LWS.smiCra    | C-type | Chordata | Sminthopsis   | crassicaudata | dunnart               | ACA28596.1     |
| Tpringle | >LWS.takRub    | C-type | Chordata | Takifugu      | rubripes      | fugu                  | AAT38456.1     |
| UMBC     | >LWS.Turtru    | C-type | Chordata | Tursiops      | truncatus     | dolphin               | AAC12941.1     |
| Tpringle | >LWS.xenTro    | C-type | Chordata | Xenopus       | tropicalis    | frog                  | NP_001096331.1 |
| Tpringle | >LWS1.calMil   | C-type | Chordata | Callorhinchus | milii         | elephantfish          | ABU84863.1     |
| Tpringle | >LWS2.calMil   | C-type | Chordata | Callorhinchus | milii         | elephantfish          | ABU84864.1     |
| UMBC     | >MWS.Ambtig    | C-type | Chordata | Ambystoma     | tigrinum      | tiger<br>salamander   | AAC96070.1     |
| UMBC     | >MWS.AstfasRED | C-type | Chordata | Astyanax      | fasciatus     | mexican<br>cave tetra | AAA02766.1     |
| UMBC     | >MWS.AstmexGR  | C-type | Chordata | Astyanax      | mexicanus     | mexican<br>cave tetra | AAA67215.1     |
| UMBC     | >MWS.Ategeo    | C-type | Chordata | Ateles        | geoffroyi     | spider<br>monkey      | BAD97425.1     |
| UMBC     | >MWS.Bostau    | C-type | Chordata | Bos           | taurus        | cow                   | NP_776991.1    |
| UMBC     | >MWS.Caljac1   | C-type | Chordata | Callithrix    | jacchus       | marmoset              | BAB58964.1     |

|      |                     |        |          |             |           |            |                |
|------|---------------------|--------|----------|-------------|-----------|------------|----------------|
| UMBC | >MWS.Caraur         | C-type | Chordata | Carassius   | auratus   | goldfish   | AAA49190.1     |
| UMBC | >MWS.Cavpor         | C-type | Chordata | Cavia       | porcellus | guinea pig | AAD30523.1     |
| UMBC | >MWS.Cebcap         | C-type | Chordata | Cebus       | capucinus | monkey     | BAD97422.1     |
| UMBC | >MWS.Cercon         | C-type | Chordata | Cercartetus | concinus  | possum     | AAX11258.1     |
| UMBC | >MWS.Cypcar         | C-type | Chordata | Cyprinus    | carpio    | carp       | BAB32496.1     |
| UMBC | >MWS.Danrer.OPN1LW1 | C-type | Chordata | Danio       | rerio     | zebrafish  | NP_571250.1    |
| UMBC | >MWS.Danrer.OPN1LW2 | C-type | Chordata | Danio       | rerio     | zebrafish  | NP_001002443.1 |
| UMBC | >MWS.Deldel         | C-type | Chordata | Delphinus   | delphis   | dolphin    | AAP13020.1     |
| UMBC | >MWS.Enhlut         | C-type | Chordata | Enhydra     | lutris    | sea otter  | AAX78226.1     |
| UMBC | >MWS.Equcab         | C-type | Chordata | Equus       | caballus  | horse      | NP_001075314.1 |
| UMBC | >MWS.Eribar         | C-type | Chordata | Erignathus  | barbatus  | seal       | AAX78227.1     |
| UMBC | >MWS.Felcat         | C-type | Chordata | Felis       | catus     | cat        | NP_001009871.1 |

|      |             |        |          |               |                |                  |             |
|------|-------------|--------|----------|---------------|----------------|------------------|-------------|
| UMBC | >MWS.Gecgec | C-type | Chordata | Gecko         | gecko          | gecko            | AAA49308.1  |
| UMBC | >MWS.Glomel | C-type | Chordata | Globicephala  | melas          | whale            | AAP13015.1  |
| UMBC | >MWS.Isoobe | C-type | Chordata | Isoodon       | obesulus       | quenda           | AAW69833.1  |
| UMBC | >MWS.Lepwed | C-type | Chordata | Leptonychotes | weddellii      | seal             | AAX78224.1  |
| UMBC | >MWS.Loxafr | C-type | Chordata | Loxodonta     | africana       | elephant         | AAT95415.1  |
| UMBC | >MWS.Lucgoo | C-type | Chordata | Lucania       | goodei         | fish             | AAP57201.1  |
| UMBC | >MWS.Macfas | C-type | Chordata | Macaca        | fascicularis   | macaque          | AAD40325.1  |
| UMBC | >MWS.Mirang | C-type | Chordata | Mirounga      | angustirostris | elephant<br>seal | AAX78223.1  |
| UMBC | >MWS.Musmus | C-type | Chordata | Mus           | musculus       | mouse            | NP_032132.1 |
| UMBC | >MWS.Nanehr | C-type | Chordata | Nannospalax   | ehrenbergi     | molerat          | AAF27288.1  |
| UMBC | >MWS.Odoros | C-type | Chordata | Odobenus      | rosmarus       | walrus           | AAX78220.1  |
| UMBC | >MWS.Odovir | C-type | Chordata | Odocoileus    | virginianus    | deer             | AAD30522.1  |



|      |              |        |          |              |                              |          |                |
|------|--------------|--------|----------|--------------|------------------------------|----------|----------------|
| UMBC | >MWS.Oncmyk  | C-type | Chordata | Oncorhynchus | mykiss                       | trout    | NP_001117792.1 |
| UMBC | >MWS.Oncner  | C-type | Chordata | Oncorhynchus | nerka                        | salmon   | AAP58346.1     |
| UMBC | >MWS.Otocra  | C-type | Chordata | Otolemur     | crassicaudatus               | lemur    | BAD02407.1     |
| UMBC | >MWS.Phelon  | C-type | Chordata | Phelsuma     | madagascariensis_longintinue | lizard   | AAD25917.1     |
| UMBC | >MWS.Phogro  | C-type | Chordata | Phoca        | groenlandica                 | seal     | AAP13018.1     |
| UMBC | >MWS.Phopho  | C-type | Chordata | Phocoena     | phocoena                     | porpoise | 30313997       |
| UMBC | >MWS.Phovit  | C-type | Chordata | Phoca        | vitulina                     | seal     | AY228448       |
| UMBC | >MWS.Plealt2 | C-type | Chordata | Plecoglossus | altivelis                    | smelt    | 53828362       |
| UMBC | >MWS.Ratnor  | C-type | Chordata | Rattus       | norvegicus                   | rat      | 16758313       |
| UMBC | >MWS.Salsal  | C-type | Chordata | Salmo        | salar                        | salmon   | NM_001123705.1 |
| UMBC | >MWS.Scicar  | C-type | Chordata | Sciurus      | carolinensis                 | squirrel | 4836695        |
| UMBC | >MWS.Setbra  | C-type | Chordata | Setonix      | brachyurus                   | quokka   | AY745192       |

|          |               |        |          |              |                  |             |              |
|----------|---------------|--------|----------|--------------|------------------|-------------|--------------|
| UMBC     | >MWS.Spetri   | C-type | Chordata | Spermophilus | tridecemlineatus | squirrel    | 56787003     |
| UMBC     | >MWS.Susscr   | C-type | Chordata | Sus          | scrofa           | pig         | 58332859     |
| UMBC     | >MWS.Tacacu   | C-type | Chordata | Tachyglossus | aculeatus        | echidna     | 189303848    |
| UMBC     | >MWS.Taegut   | C-type | Chordata | Taeniopygia  | guttata          | finch       | 115529263    |
| UMBC     | >MWS.Triman   | C-type | Chordata | Trichechus   | manatus          | manatee     | AY228447     |
| UMBC     | >MWS.Ursmar   | C-type | Chordata | Ursus        | maritimus        | polar bear  | 62275517     |
| UMBC     | >MWS.Xenlae   | C-type | Chordata | Xenopus      | laevis           | frog        | 1905842      |
| UMBC     | >MWS.Zalcal   | C-type | Chordata | Zalophus     | californianus    | sea lion    | 62275493     |
| Tpringle | >PARIE.anoCar | C-type | Chordata | Anolis       | carolinensis     | lizard      | AAD32622.1   |
| Tpringle | >PARIE.danRer | C-type | Chordata | Danio        | rerio            | zebrafish   | XP_003201482 |
| Tpringle | >PARIE.gasAcu | C-type | Chordata | Gasterosteus | aculeatus        | stickleback | Genome       |
| Tpringle | >PARIE.takRub | C-type | Chordata | Takifugu     | rubripes         | fugu        | Genome       |

|          |               |        |          |             |                  |           |                |
|----------|---------------|--------|----------|-------------|------------------|-----------|----------------|
| Tpringle | >PARIE.utaSta | C-type | Chordata | Uta         | stansburiana     | lizard    | DQ100320       |
| Tpringle | >PARIE.xenTro | C-type | Chordata | Xenopus     | tropicalis       | frog      | NP_001039256.1 |
| Tpringle | >PIN.bufJap   | C-type | Chordata | Bufo        | japonicus        | toad      | AF200433       |
| Tpringle | >PIN.colLiv   | C-type | Chordata | Columba     | livia            | pigeon    | AAB40945.1     |
| Tpringle | >PIN.galGal   | C-type | Chordata | Gallus      | gallus           | chicken   | NP_990740.1    |
| Tpringle | >PIN.pheMad   | C-type | Chordata | Phelsuma    | madagascariensis | lizard    | AB022881       |
| Tpringle | >PIN.podSic   | C-type | Chordata | Podarcis    | sicula           | lizard    | DQ013042       |
| Tpringle | >PIN.taeGut   | C-type | Chordata | Taeniopygia | guttata          | finch     | Genome         |
| Tpringle | >PIN.utaSta   | C-type | Chordata | Uta         | stansburiana     | lizard    | DQ100321       |
| Tpringle | >PIN.xenTro   | C-type | Chordata | Xenopus     | tropicalis       | frog      | XP_002934391.1 |
| Tpringle | >PPIN.anoCar  | C-type | Chordata | Anolis      | carolinensis     | lizard    | XP_003217796   |
| Tpringle | >PPIN.danRer  | C-type | Chordata | Danio       | rerio            | zebrafish | NP_001005312.1 |

|          |               |        |          |              |              |             |              |
|----------|---------------|--------|----------|--------------|--------------|-------------|--------------|
| Tpringle | >PPIN.ictPun  | C-type | Chordata | Ictalurus    | punctatus    | catfish     | AF028014     |
| Tpringle | >PPIN.letJap  | C-type | Chordata | Lethenteron  | japonicum    | lamprey     | AB116380     |
| Tpringle | >PPIN.oncMyk  | C-type | Chordata | Oncorhynchus | mykiss       | trout       | BAD17961     |
| Tpringle | >PPIN.xenTro  | C-type | Chordata | Xenopus      | tropicalis   | frog        | AAI71331.1   |
| Tpringle | >PPINa.cioInt | C-type | Chordata | Ciona        | intestinalis | tunicate    | NM_001032555 |
| Tpringle | >PPINa.cioSav | C-type | Chordata | Ciona        | savignyi     | tunicate    | EST library  |
| Tpringle | >PPINa.gasAcu | C-type | Chordata | Gasterosteus | aculeatus    | stickleback | DN691173     |
| Tpringle | >PPINa.petMar | C-type | Chordata | Petromyzon   | marinus      | lamprey     | Genome       |
| Tpringle | >PPINa.takRub | C-type | Chordata | Takifugu     | rubripes     | fugu        | Genome       |
| Tpringle | >PPINa.tetNig | C-type | Chordata | Tetraodon    | nigroviridis | pufferfish  | CAG06878     |
| Tpringle | >PPINb.cioInt | C-type | Chordata | Ciona        | intestinalis | tunicate    | XP_002119963 |
| Tpringle | >PPINb.cioSav | C-type | Chordata | Ciona        | savignyi     | tunicate    | EST library  |

|          |               |        |          |              |               |                       |          |
|----------|---------------|--------|----------|--------------|---------------|-----------------------|----------|
| Tpringle | >PPINb.gasAcu | C-type | Chordata | Gasterosteus | aculeatus     | stickleback           | DW621258 |
| Tpringle | >PPINb.takRub | C-type | Chordata | Takifugu     | rubripes      | fugu                  | Genome   |
| Tpringle | >PPINb.tetNig | C-type | Chordata | Tetraodon    | nigroviridis  | pufferfish            | Genome   |
| UMBC     | >Rh1.Ambtig   | C-type | Chordata | Ambystoma    | tigrinum      | tiger<br>salamander   | 1477471  |
| UMBC     | >RH1.Anapla   | C-type | Chordata | Anas         | platyrhynchos | duck                  | AF021240 |
| UMBC     | >Rh1.Astmex   | C-type | Chordata | Astyanax     | mexicanus     | mexican<br>cave tetra | AMU12328 |
| UMBC     | >Rh1.Bufbuf   | C-type | Chordata | Bufo         | bufo          | toad                  | 2734705  |
| UMBC     | >Rh1.Bufmar   | C-type | Chordata | Bufo         | marinus       | toad                  | 2734707  |
| UMBC     | >RH1.Calphi   | C-type | Chordata | Caluromys    | philander     | opossum               | AY313946 |
| UMBC     | >Rh1.Canfam   | C-type | Chordata | Canis        | familiaris    | dog                   | 311989   |
| UMBC     | >Rh1.Caraur   | C-type | Chordata | Carassius    | auratus       | goldfish              | 213016   |
| UMBC     | >Rh1.Ccar     | C-type | Chordata | Cyprinus     | carpio        | carp                  | 2598279  |

|      |             |        |          |              |             |            |                |
|------|-------------|--------|----------|--------------|-------------|------------|----------------|
| UMBC | >Rh1.Chedad | C-type | Chordata | Chela        | dadiburjori | dadio fish | EF452915       |
| UMBC | >Rh1.Danrer | C-type | Chordata | Danio        | rerio       | zebrafish  | 197246964      |
| UMBC | >Rh1.Deldel | C-type | Chordata | Delphinus    | delphis     | dolphin    | AF055314       |
| UMBC | >Rh1.Dipvul | C-type | Chordata | Diplodus     | vulgaris    | seabream   | 4210636        |
| UMBC | >RH1.Enhlut | C-type | Chordata | Enhydra      | lutris      | sea otter  | AY883931       |
| UMBC | >RH1.Eribar | C-type | Chordata | Erignathus   | barbatus    | seal       | AY883932       |
| UMBC | >Rh1.Felcat | C-type | Chordata | Felis        | catus       | cat        | NM_001009242.1 |
| UMBC | >Rh1.Gadmor | C-type | Chordata | Gadus        | morhua      | cod        | 33306307       |
| UMBC | >Rh1.Galmel | C-type | Chordata | Galeus       | melastomus  | catshark   | Y17586         |
| UMBC | >Rh1.Gasspi | C-type | Chordata | Garra        | spilota     | fish       | EU409649       |
| UMBC | >Rh1.Glomel | C-type | Chordata | Globicephala | melas       | whale      | AF055315       |
| UMBC | >Rh1.Gobnig | C-type | Chordata | Gobius       | niger       | goby       | 4210640        |

|      |             |        |          |               |                |                  |                |
|------|-------------|--------|----------|---------------|----------------|------------------|----------------|
| UMBC | >Rh1.Hhip   | C-type | Chordata | Hippoglossus  | hippoglossus   | halibut          | 20269371       |
| UMBC | >RH1.Hydlep | C-type | Chordata | Hydrurga      | leptonyx       | seal             | AY883930       |
| UMBC | >RH1.Lepwed | C-type | Chordata | Leptonychotes | weddellii      | seal             | AY883929       |
| UMBC | >Rh1.Loxafr | C-type | Chordata | Loxodonta     | africana       | elephant         | 51101220       |
| UMBC | >Rh1.Macfas | C-type | Chordata | Macaca        | fascicularis   | macaque          | 913368         |
| UMBC | >Rh1.Mesbid | C-type | Chordata | Mesoplodon    | bidens         | whale            | AF055316       |
| UMBC | >Rh1.Mirang | C-type | Chordata | Mirounga      | angustirostris | elephant<br>seal | AY228452       |
| UMBC | >Rh1.Musmus | C-type | Chordata | Mus           | musculus       | mouse            | 21594394       |
| UMBC | >Rh1.Notath | C-type | Chordata | Notropis      | atherinoides   | shiner           | EF452903       |
| UMBC | >RH1.Odoros | C-type | Chordata | Odobenus      | rosmarus       | walrus           | AY883925       |
| UMBC | >Rh1.Orycun | C-type | Chordata | Oryctolagus   | cuniculus      | rabbit           | NM_001082349.1 |
| UMBC | >Rh1.Otcra  | C-type | Chordata | Otolemur      | crassicaudatus | lemur            | AB112591       |

|      |             |        |          |                    |               |          |            |
|------|-------------|--------|----------|--------------------|---------------|----------|------------|
| UMBC | >Rh1.Parinn | C-type | Chordata | Paracheirodon      | innesi        | tetra    | 84095053   |
| UMBC | >Rh1.Phogro | C-type | Chordata | Phoca              | groenlandica  | seal     | AF055318   |
| UMBC | >Rh1.Phovit | C-type | Chordata | Phoca              | vitulina      | seal     | AF055317   |
| UMBC | >Rh1.Poeret | C-type | Chordata | Poecilia           | reticulata    | guppy    | 1841472    |
| UMBC | >Rh1.Pseame | C-type | Chordata | Pseudopleuronectes | americanus    | flounder | 50254000   |
| UMBC | >Rh1.Ratnor | C-type | Chordata | Rattus             | norvegicus    | rat      | U22180     |
| UMBC | >Rh1.Sarpil | C-type | Chordata | Sardina            | pilchardus    | sardine  | Y18677     |
| UMBC | >Rh1.Scoana | C-type | Chordata | Scopelarchus       | analis        | pearleye | EF517404   |
| UMBC | >RH1.Smicra | C-type | Chordata | Sminthopsis        | crassicaudata | dunnart  | AAN86046.2 |
| UMBC | >Rh1.Spaehr | C-type | Chordata | Spalax             | ehrenbergi    | mole rat | 10954028   |
| UMBC | >Rh1.Susscr | C-type | Chordata | Sus                | scrofa        | pig      | 47523517   |
| UMBC | >Rh1.Taegut | C-type | Chordata | Taeniopygia        | guttata       | finch    | 115529257  |



|      |                   |        |          |               |               |             |            |
|------|-------------------|--------|----------|---------------|---------------|-------------|------------|
| UMBC | >Rh1.Triman       | C-type | Chordata | Trichechus    | manatus       | manatee     | AF055319   |
| UMBC | >Rh1.Turtru       | C-type | Chordata | Tursiops      | truncatus     | dolphin     | AF055456   |
| UMBC | >RH1.Ursmar       | C-type | Chordata | Ursus         | maritimus     | polar bear  | AY883926   |
| UMBC | >Rh1.Xenlae       | C-type | Chordata | Xenopus       | laevis        | frog        | 214734     |
| UMBC | >Rh1.Zactem       | C-type | Chordata | Zacco         | temminckii    | chub        | EF452918   |
| UMBC | >RH1.Zalcal       | C-type | Chordata | Zalophus      | californianus | sea lion    | AY883924   |
| UMBC | >RH2.Acabut.Rh2Aa | C-type | Chordata | Acanthopagrus | butcheri      | black bream | EU090913   |
| UMBC | >RH2.Acabut.Rh2Ab | C-type | Chordata | Acanthopagrus | butcheri      | black bream | EU090914   |
| UMBC | >RH2.Anapla       | C-type | Chordata | Anas          | platyrhynchos | duck        | 2781422    |
| UMBC | >RH2.Caraur       | C-type | Chordata | Carassius     | auratus       | goldfish    | 212959     |
| UMBC | >RH2.Colliv       | C-type | Chordata | Columba       | livia         | pigeon      | AAD32242.1 |
| UMBC | >RH2.Cypcar1      | C-type | Chordata | Cyprinus      | carpio        | carp        | 42627736   |

|          |              |        |          |                    |               |              |            |
|----------|--------------|--------|----------|--------------------|---------------|--------------|------------|
| UMBC     | >RH2.Cypcar2 | C-type | Chordata | Cyprinus           | carpio        | carp         | 31071631   |
| UMBC     | >RH2.Dismaw  | C-type | Chordata | Dissostichus       | mawsoni       | toothfish    | 55585550   |
| UMBC     | >RH2.Melund  | C-type | Chordata | Melopsittacus      | undulatus     | budgerigar   | AF021241   |
| UMBC     | >RH2.Notang  | C-type | Chordata | Notothenia         | angustata     | cod          | AY771354   |
| UMBC     | >RH2.Pagbor  | C-type | Chordata | Pagothenia         | borchgrevinki | rockcod      | AY771353   |
| UMBC     | >RH2.Pseame  | C-type | Chordata | Pseudopleuronectes | americanus    | flounder     | 50254002   |
| UMBC     | >RH2.Scoana  | C-type | Chordata | Scopelarchus       | analis        | pearleye     | EF517406   |
| UMBC     | >RH2.Sercan  | C-type | Chordata | Serinus            | canaria       | canary       | 7981417    |
| UMBC     | >RH2.Thuori  | C-type | Chordata | Thunnus            | orientalis    | tuna         | AB290451   |
| UMBC     | >RH2.Utasta  | C-type | Chordata | Uta                | stansburiana  | lizard       | DQ100324   |
| Tpringle | >RHO1.angAng | C-type | Chordata | Anguilla           | anguilla      | european eel | ACT34384.1 |
| Tpringle | >RHO1.anoCar | C-type | Chordata | Anolis             | carolinensis  | lizard       | P41591.1   |

|          |              |        |          |                 |            |              |                |
|----------|--------------|--------|----------|-----------------|------------|--------------|----------------|
| Tpringle | >RHO1.bosTau | C-type | Chordata | Bos             | taurus     | cow          | NM_001014890   |
| Tpringle | >RHO1.calMil | C-type | Chordata | Callorhinchus   | milii      | elephantfish | ABU84865.1     |
| Tpringle | >RHO1.conMyr | C-type | Chordata | Conger          | myriaster  | conger eel   | BAB21486.1     |
| Tpringle | >RHO1.galGal | C-type | Chordata | Gallus          | gallus     | chicken      | NM_205490      |
| Tpringle | >RHO1.geoAus | C-type | Chordata | Geotria         | australis  | lamprey      | AY366493       |
| Tpringle | >RHO1.homSap | C-type | Chordata | Homo            | sapiens    | human        | NM_000539      |
| Tpringle | >RHO1.latCha | C-type | Chordata | Latimeria       | chalumnae  | coelacanth   | AAD30519       |
| Tpringle | >RHO1.letJap | C-type | Chordata | Lethenteron     | japonicum  | lamprey      | AB116382       |
| Tpringle | >RHO1.leuEri | C-type | Chordata | Leucoraja       | erinacea   | skate        | U81514         |
| Tpringle | >RHO1.monDom | C-type | Chordata | Monodelphis     | domesticus | opossum      | XP_001366225.1 |
| Tpringle | >RHO1.neoFor | C-type | Chordata | Neoceratodus    | forsteri   | lungfish     | ABS89278.1     |
| Tpringle | >RHO1.ornAna | C-type | Chordata | Ornithorhynchus | anatinus   | platypus     | ABN43074       |

|          |              |        |          |               |              |              |                |
|----------|--------------|--------|----------|---------------|--------------|--------------|----------------|
| Tpringle | >RHO1.petMar | C-type | Chordata | Petromyzon    | marinus      | lamprey      | Q98980.1       |
| Tpringle | >RHO1.takRub | C-type | Chordata | Takifugu      | rubripes     | fugu         | AF201472       |
| Tpringle | >RHO1.xenTro | C-type | Chordata | Xenopus       | tropicalis   | frog         | NP_001090803.1 |
| Tpringle | >RHO2.ancDan | C-type | Chordata | Danio         | rerio        | zebrafish    | Genome         |
| Tpringle | >RHO2.anoCar | C-type | Chordata | Anolis        | carolinensis | lizard       | AAB35062.1     |
| Tpringle | >RHO2.calMil | C-type | Chordata | Callorhinchus | milii        | elephantfish | EF565168       |
| Tpringle | >RHO2.galGal | C-type | Chordata | Gallus        | gallus       | chicken      | NP_990821      |
| Tpringle | >RHO2.gasAcu | C-type | Chordata | Gasterosteus  | aculeatus    | stickleback  | Genome         |
| Tpringle | >RHO2.geoAus | C-type | Chordata | Geotria       | australis    | lamprey      | AY366494       |
| Tpringle | >RHO2.hipHip | C-type | Chordata | Hippoglossus  | hippoglossus | halibut      | AF156263       |
| Tpringle | >RHO2.latCha | C-type | Chordata | Latimeria     | chalumnae    | coelacanth   | AH007713       |
| Tpringle | >RHO2.mulSur | C-type | Chordata | Mullus        | surmuletus   | mullet       | Y18680         |

|          |               |        |          |                |                  |           |              |
|----------|---------------|--------|----------|----------------|------------------|-----------|--------------|
| Tpringle | >RHO2.neoFor  | C-type | Chordata | Neoceratodus   | forsteri         | lungfish  | ABS89279.1   |
| Tpringle | >RHO2.oreNil  | C-type | Chordata | Oreochromis    | niloticus        | tilapia   | AF247124     |
| Tpringle | >RHO2.oryLat  | C-type | Chordata | Oryzias        | latipes          | medaka    | NP_001098125 |
| Tpringle | >RHO2.pheMad  | C-type | Chordata | Phelsuma       | madagascariensis | lizard    | AF074044     |
| Tpringle | >RHO2.podSic  | C-type | Chordata | Podarcis       | sicula           | lizard    | AY941829     |
| Tpringle | >RHO2.pomMin  | C-type | Chordata | Pomatoschistus | minutus          | sand goby | Y18679       |
| Tpringle | >RHO2.taeGut  | C-type | Chordata | Taeniopygia    | guttata          | finch     | NM_001076696 |
| Tpringle | >RHO2.takRub  | C-type | Chordata | Takifugu       | rubripes         | fugu      | AF226989     |
| Tpringle | >RHO2a.danRer | C-type | Chordata | Danio          | rerio            | zebrafish | NM_131253    |
| Tpringle | >RHO2b.danRer | C-type | Chordata | Danio          | rerio            | zebrafish | NM_182891    |
| Tpringle | >RHO2c.danRer | C-type | Chordata | Danio          | rerio            | zebrafish | NM_182892    |
| Tpringle | >RHO2d.danRer | C-type | Chordata | Danio          | rerio            | zebrafish | NM_131254    |

|          |              |        |          |               |              |                  |            |
|----------|--------------|--------|----------|---------------|--------------|------------------|------------|
| UMBC     | >SWS1.Acabut | C-type | Chordata | Acanthopagrus | butcheri     | black bream      | ABC75599   |
| UMBC     | >SWS1.Alopal | C-type | Chordata | Alouatta      | palliated    | howler monkey    | AAB94764   |
| UMBC     | >SWS1.Ambtig | C-type | Chordata | Ambystoma     | tigrinum     | tiger salamander | AAC96071   |
| Tpringle | >SWS1.anoCar | C-type | Chordata | Anolis        | carolinensis | lizard           | AAD32621.1 |
| UMBC     | >SWS1.Aulhue | C-type | Chordata | Aulonocara    | hueseri      | cichlid          | AAY26075   |
| UMBC     | >SWS1.Botau  | C-type | Chordata | Bos           | taurus       | cow              | NP_776992  |
| UMBC     | >SWS1.Canfam | C-type | Chordata | Canis         | familiaris   | dog              | XP_539386  |
| UMBC     | >SWS1.Caraur | C-type | Chordata | Carassius     | auratus      | goldfish         | Q90309     |
| UMBC     | >SWS1.Cavpor | C-type | Chordata | Cavia         | porcellus    | guinea pig       | AAT36312   |
| UMBC     | >SWS1.Ceboli | C-type | Chordata | Cebus         | olivaceus    | monkey           | AAB95487   |
| UMBC     | >SWS1.Colliv | C-type | Chordata | Columba       | livia        | pigeon           | AAD38034   |
| UMBC     | >SWS1.Copbor | C-type | Chordata | Copadichromis | borleyi      | cichlid          | AAY26081   |

|          |              |        |          |                |                  |           |              |
|----------|--------------|--------|----------|----------------|------------------|-----------|--------------|
| UMBC     | >SWS1.Cynafr | C-type | Chordata | Cynotilapia    | afra             | cichlid   | AAV26079     |
| UMBC     | >SWS1.Cynpyr | C-type | Chordata | Cynops         | pyrrhogaster     | newt      | BAB79499     |
| UMBC     | >SWS1.Cypcar | C-type | Chordata | Cyprinus       | carpio           | carp      | BAC78823     |
| Tpringle | >SWS1.danRer | C-type | Chordata | Danio          | rerio            | zebrafish | NP_571394.1  |
| UMBC     | >SWS1.Daumad | C-type | Chordata | Daubentonia    | madagascariensis | aye-aye   | ABR53744     |
| UMBC     | >SWS1.Dimcom | C-type | Chordata | Dimidiochromis | compressiceps    | cichlid   | AAF05731     |
| UMBC     | >SWS1.Dismaw | C-type | Chordata | Dissostichus   | mawsoni          | toothfish | AAX99140     |
| UMBC     | >SWS1.Equcab | C-type | Chordata | Equus          | caballus         | horse     | XP_001502785 |
| UMBC     | >SWS1.Eulful | C-type | Chordata | Eulemur        | fulvus           | lemur     | BAD14291     |
| Tpringle | >SWS1.galGal | C-type | Chordata | Gallus         | gallus           | chicken   | NP_990769.1  |
| UMBC     | >SWS1.Gekgek | C-type | Chordata | Gecko          | gecko            | gecko     | AAG61163     |
| Tpringle | >SWS1.geoAus | C-type | Chordata | Geotria        | australis        | lamprey   | AY366495     |

|          |              |        |          |               |              |               |              |
|----------|--------------|--------|----------|---------------|--------------|---------------|--------------|
| UMBC     | >SWS1.Gymacu | C-type | Chordata | Gymnodraco    | acuticeps    | fish          | AAX99145     |
| UMBC     | >SWS1.Hiphip | C-type | Chordata | Hippoglossus  | hippoglossus | halibut       | AF156264     |
| Tpringle | >SWS1.homSap | C-type | Chordata | Homo          | sapiens      | human         | NP_001699    |
| UMBC     | >SWS1.Isoobe | C-type | Chordata | Isodon        | obesulus     | quenda        | AAU29518     |
| UMBC     | >SWS1.Labchi | C-type | Chordata | Labidochromis | chisumulae   | cichlid       | AAZ26073     |
| UMBC     | >SWS1.Lepfit | C-type | Chordata | Lepidopus     | fitchi       | scabbardfish  | ACJ72019     |
| UMBC     | >SWS1.Letpar | C-type | Chordata | Lethrinops    | parvidens    | cichlid       | AAZ26077     |
| UMBC     | >SWS1.Loxafr | C-type | Chordata | Loxodonta     | africana     | elephant      | AAT95414     |
| UMBC     | >SWS1.Lucgoo | C-type | Chordata | Lucania       | goodei       | fish          | AAP57195     |
| UMBC     | >SWS1.Maceug | C-type | Chordata | Macropus      | eugenii      | wallaby       | AAP37944     |
| UMBC     | >SWS1.Macmul | C-type | Chordata | Macaca        | mulatta      | rhesus monkey | XP_001091869 |
| UMBC     | >SWS1.Melaur | C-type | Chordata | Melanochromis | auratus      | cichlid       | AAZ26076     |



|          |              |        |          |                  |               |            |                |
|----------|--------------|--------|----------|------------------|---------------|------------|----------------|
| UMBC     | >SWS1.Melund | C-type | Chordata | Melopsittacus    | undulatus     | budgerigar | O57605         |
| UMBC     | >SWS1.Melver | C-type | Chordata | Melanochromis    | vermivorus    | cichlid    | AAZ53203       |
| Tpringle | >SWS1.monDom | C-type | Chordata | Monodelphis      | domesticus    | opossum    | NP_001138556.1 |
| UMBC     | >SWS1.Mumus  | C-type | Chordata | Mus              | musculus      | mouse      | NP_031564      |
| Tpringle | >SWS1.neoFor | C-type | Chordata | Neoceratodus     | forsteri      | lungfish   | EF526298.1     |
| UMBC     | >SWS1.Neoomn | C-type | Chordata | Neochromis       | omnicaeruleus | cichlid    | AAV93292       |
| UMBC     | >SWS1.Notang | C-type | Chordata | Notothenia       | angustata     | cod        | AAX99143       |
| UMBC     | >SWS1.Oncmyk | C-type | Chordata | Oncorhynchus     | mykiss        | trout      | NP_001117793   |
| UMBC     | >SWS1.Oncner | C-type | Chordata | Oncorhynchus     | nerka         | salmon     | AAP58349       |
| UMBC     | >SWS1.Ophven | C-type | Chordata | Ophthalmotilapia | ventralis     | cichlid    | AAZ26072       |
| UMBC     | >SWS1.Orenil | C-type | Chordata | Oreochromis      | niloticus     | tilapia    | AAF05732       |
| Tpringle | >SWS1.oryLat | C-type | Chordata | Oryzias          | latipes       | medaka     | NM_001104656.1 |

|          |                 |        |          |                |                              |           |          |
|----------|-----------------|--------|----------|----------------|------------------------------|-----------|----------|
| UMBC     | >SWS1.Pagbor    | C-type | Chordata | Pagothenia     | borchgrevinki                | rockcod   | AAX99142 |
| UMBC     | >SWS1.Pagmac    | C-type | Chordata | Pagetopsis     | macropterus                  | fish      | AAX99144 |
| Tpringle | >SWS1.petMar    | C-type | Chordata | Geotria        | australis                    | lamprey   | AAR14684 |
| UMBC     | >SWS1.Phacar    | C-type | Chordata | Phalacrocorax  | carbo                        | cormorant | ABS86975 |
| UMBC     | >SWS1.Phemad    | C-type | Chordata | Phelsuma       | madagascariensis_longintinue | lizard    | AAD45183 |
| UMBC     | >SWS1.PlealtUV1 | C-type | Chordata | Plecoglossus   | altivelis                    | smelt     | BAD54746 |
| UMBC     | >SWS1.PlealtUV2 | C-type | Chordata | Plecoglossus   | altivelis                    | smelt     | BAD54747 |
| UMBC     | >SWS1.Poeret    | C-type | Chordata | Poecilia       | reticulata                   | guppy     | ABB69699 |
| UMBC     | >SWS1.Pseace    | C-type | Chordata | Pseudotropheus | acei                         | cichlid   | AAZ53202 |
| UMBC     | >SWS1.Punazu    | C-type | Chordata | Pundamilia     | azurea                       | cichlid   | AAV93287 |
| UMBC     | >SWS1.Punnye    | C-type | Chordata | Pundamilia     | nyererei                     | cichlid   | AAV93285 |
| UMBC     | >SWS1.Rancat    | C-type | Chordata | Rana           | catesbeiana                  | frog      | BAA96828 |

|          |               |        |          |                 |               |             |                |
|----------|---------------|--------|----------|-----------------|---------------|-------------|----------------|
| UMBC     | >SWS1.Ratnor  | C-type | Chordata | Rattus          | norvegicus    | rat         | EDM15216       |
| UMBC     | >SWS1.Saimbol | C-type | Chordata | Saimiri         | boliviensis   | monkey      | O13092         |
| UMBC     | >SWS1.Salsal  | C-type | Chordata | Salmo           | salar         | salmon      | NP_001117180   |
| UMBC     | >SWS1.Scicar  | C-type | Chordata | Sciurus         | carolinensis  | squirrel    | ABC26408       |
| UMBC     | >SWS1.Scomax  | C-type | Chordata | Scophthalmus    | maximus       | fish        | AF385825       |
| UMBC     | >SWS1.Setbra  | C-type | Chordata | Setonix         | brachyurus    | quokka      | AAU29519       |
| Tpringle | >SWS1.smiCra  | C-type | Chordata | Sminthopsis     | crassicaudata | dunnart     | AY442173       |
| UMBC     | >SWS1.Sphhum  | C-type | Chordata | Spheniscus      | humboldti     | penguin     | CAC20913       |
| UMBC     | >SWS1.Steleu  | C-type | Chordata | Stenobranchius  | leucopsarus   | lanternfish | ACJ72020       |
| UMBC     | >SWS1.Stimod  | C-type | Chordata | Stigmatochromis | modestus      | cichlid     | AAAY26082      |
| UMBC     | >SWS1.Susscr  | C-type | Chordata | Sus             | scrofa        | pig         | NP_999255      |
| Tpringle | >SWS1.taeGut  | C-type | Chordata | Taeniopygia     | guttata       | finch       | NP_001070172.1 |

|          |              |        |          |                |              |                    |              |
|----------|--------------|--------|----------|----------------|--------------|--------------------|--------------|
| UMBC     | >SWS1.Tarban | C-type | Chordata | Tarsius        | bancanus     | tarsier            | BAD14290     |
| Tpringle | >SWS1.tarRos | C-type | Chordata | Tarsipes       | rostratus    | honey possum       | AY772472     |
| UMBC     | >SWS1.Treloe | C-type | Chordata | Trematomus     | loennbergii  | fish               | AAX99141     |
| UMBC     | >SWS1.Trodub | C-type | Chordata | Tropheus       | duboisii     | cichlid            | AAZ26074     |
| Tpringle | >SWS1.utaSta | C-type | Chordata | Uta            | stansburiana | lizard             | DQ100325     |
| Tpringle | >SWS1.xenLae | C-type | Chordata | Xenopus        | laevis       | frog               | AAH84882.1   |
| UMBC     | >SWS1.Xentro | C-type | Chordata | Xenopus        | tropicalis   | frog               | NP_001119548 |
| UMBC     | >SWS2.Ambtig | C-type | Chordata | Ambystoma      | tigrinum     | tiger salamander   | AAC96069     |
| Tpringle | >SWS2.anoCar | C-type | Chordata | Anolis         | carolinensis | lizard             | AAD32621.1   |
| UMBC     | >SWS2.Astbur | C-type | Chordata | Astatotilapia  | burtoni      | tilapia            | AAT79866     |
| UMBC     | >SWS2.Astmex | C-type | Chordata | Astyanax       | mexicanus    | mexican cave tetra | P51472       |
| UMBC     | >SWS2.Batnik | C-type | Chordata | Batrachocottus | nikolskii    | sculpin            | CAD23113     |

|          |                |        |          |                 |              |           |           |
|----------|----------------|--------|----------|-----------------|--------------|-----------|-----------|
| UMBC     | >SWS2.Caraur   | C-type | Chordata | Carassius       | auratus      | goldfish  | P32310    |
| UMBC     | >SWS2.Colliv   | C-type | Chordata | Columba         | livia        | pigeon    | AAD38035  |
| UMBC     | >SWS2.Cotgob   | C-type | Chordata | Cottus          | gobio        | sculpin   | CAD23111  |
| UMBC     | >SWS2.Cotine   | C-type | Chordata | Cottocomephorus | inermis      | sculpin   | CAD23114  |
| UMBC     | >SWS2.Cotkes   | C-type | Chordata | Cottus          | kesslerii    | sculpin   | CAD23115  |
| UMBC     | >SWS2.Cynafr2A | C-type | Chordata | Cynotilapia     | afra         | cichlid   | AA26046   |
| UMBC     | >SWS2.Cynpyr   | C-type | Chordata | Cynops          | pyrrhogaster | newt      | BAB39378  |
| UMBC     | >SWS2.Cypcar   | C-type | Chordata | Cyprinus        | carpio       | carp      | BAC78822  |
| UMBC     | >SWS2.Cypeur   | C-type | Chordata | Cyphocottus     | eurystomus   | fish      | CAD23112  |
| UMBC     | >SWS2.Danrer   | C-type | Chordata | Danio           | rerio        | zebrafish | NP_571267 |
| UMBC     | >SWS2.Gadmor   | C-type | Chordata | Gadus           | morhua       | cod       | AAQ02799  |
| Tpringle | >SWS2.galGal   | C-type | Chordata | Gallus          | gallus       | chicken   | NP_990848 |

|          |                |        |          |               |              |             |           |
|----------|----------------|--------|----------|---------------|--------------|-------------|-----------|
| Tpringle | >SWS2.gasAcu   | C-type | Chordata | Gasterosteus  | aculeatus    | stickleback | Genome    |
| Tpringle | >SWS2.geoAus   | C-type | Chordata | Geotria       | australis    | lamprey     | AY366492  |
| UMBC     | >SWS2.Hhipip   | C-type | Chordata | Hippoglossus  | hippoglossus | halibut     | AAM17920  |
| UMBC     | >SWS2.Labchi1  | C-type | Chordata | Labidochromis | chisumulae   | cichlid     | AAAY26048 |
| UMBC     | >SWS2.Labchi2  | C-type | Chordata | Labidochromis | chisumulae   | cichlid     | AAAY26051 |
| UMBC     | >SWS2.Copbor2A | C-type | Chordata | Copadichromis | borleyi      | cichlid     | AAAY26039 |
| UMBC     | >SWS2.Gekgek   | C-type | Chordata | Gekko         | gekko        | gecko       | P35357    |
| UMBC     | >SWS2.Letpar2A | C-type | Chordata | Lethrinops    | parvidens    | cichlid     | AAAY26044 |
| UMBC     | >SWS2.Lucgoo1  | C-type | Chordata | Lucania       | goodei       | fish        | AAP57196  |
| UMBC     | >SWS2.Lucgoo2  | C-type | Chordata | Lucania       | goodei       | fish        | AAP57197  |
| UMBC     | >SWS2.Mayzeb2A | C-type | Chordata | Maylandia     | zebra        | cichlid     | AAF63525  |
| UMBC     | >SWS2.Melaur2A | C-type | Chordata | Melanochromis | auratus      | cichlid     | AAAY26043 |

|          |                |        |          |                  |              |          |                |
|----------|----------------|--------|----------|------------------|--------------|----------|----------------|
| UMBC     | >SWS2.Myllat2A | C-type | Chordata | Mylochromis      | lateristriga | cichlid  | AAY26042       |
| UMBC     | >SWS2.Neobri   | C-type | Chordata | Neolamprologus   | brichardi    | cichlid  | AAY26049       |
| Tpringle | >SWS2.neoFor   | C-type | Chordata | Neoceratodus     | forsteri     | lungfish | EF526299       |
| UMBC     | >SWS2.Oncmyk   | C-type | Chordata | Oncorhynchus     | mykiss       | trout    | NP_001117794   |
| UMBC     | >SWS2.Oncner   | C-type | Chordata | Oncorhynchus     | nerka        | salmon   | AAP58350       |
| UMBC     | >SWS2.Ophven2A | C-type | Chordata | Ophthalmotilapia | ventralis    | cichlid  | AAY26038       |
| UMBC     | >SWS2.Ophven2B | C-type | Chordata | Ophthalmotilapia | ventralis    | cichlid  | AAY26050       |
| UMBC     | >SWS2.Orenil2A | C-type | Chordata | Oreochromis      | niloticus    | tilapia  | AAF63527       |
| UMBC     | >SWS2.Orenil2B | C-type | Chordata | Oreochromis      | niloticus    | tilapia  | AAF63531       |
| Tpringle | >SWS2.ornAna   | C-type | Chordata | Ornithorhynchus  | anatinus     | platypus | NP_001121098.1 |
| UMBC     | >SWS2.Orylat1  | C-type | Chordata | Oryzias          | latipes      | medaka   | BAE78650       |
| UMBC     | >SWS2.Orylat2  | C-type | Chordata | Oryzias          | latipes      | medaka   | BAE78651       |

|          |              |        |          |                    |             |          |                |
|----------|--------------|--------|----------|--------------------|-------------|----------|----------------|
| UMBC     | >SWS2.Parcya | C-type | Chordata | Paralabidochromis  | cyaneus     | cichlid  | AAV93274       |
| UMBC     | >SWS2.Poeret | C-type | Chordata | Poecilia           | reticulata  | guppy    | ABB69698       |
| UMBC     | >SWS2.Pseace | C-type | Chordata | Pseudotropheus     | acei        | cichlid  | AAZ53199       |
| UMBC     | >SWS2.Pseame | C-type | Chordata | Pseudopleuronectes | americanus  | flounder | AAT72125       |
| UMBC     | >SWS2.Punnye | C-type | Chordata | Pundamilia         | nyererei    | cichlid  | AAV93275       |
| UMBC     | >SWS2.Punpun | C-type | Chordata | Pundamilia         | pundamilia  | cichlid  | BAG56606       |
| UMBC     | >SWS2.Rancat | C-type | Chordata | Rana               | catesbeiana | frog     | BAA76864       |
| UMBC     | >SWS2.Salsal | C-type | Chordata | Salmo              | salar       | salmon   | NP_001117178   |
| UMBC     | >SWS2.Sercan | C-type | Chordata | Serinus            | canaria     | canary   | CAB91994       |
| UMBC     | >SWS2.Tacacu | C-type | Chordata | Tachyglossus       | aculeatus   | echidna  | ACD85829       |
| Tpringle | >SWS2.taeGut | C-type | Chordata | Taeniopygia        | guttata     | finch    | NP_001070172.1 |
| Tpringle | >SWS2.takRub | C-type | Chordata | Takifugu           | rubripes    | fugu     | AAT38459.1     |



|          |                     |        |          |               |              |            |              |
|----------|---------------------|--------|----------|---------------|--------------|------------|--------------|
| UMBC     | >SWS2.Tetnig        | C-type | Chordata | Tetraodon     | nigroviridis | pufferfish | AAT38460     |
| UMBC     | >SWS2.Thuori        | C-type | Chordata | Thunnus       | orientalis   | tuna       | BAG14282     |
| Tpringle | >SWS2.utaSta        | C-type | Chordata | Uta           | stansburiana | lizard     | DQ100326     |
| Tpringle | >SWS2.xenTro        | C-type | Chordata | Xenopus       | tropicalis   | frog       | XP_002937272 |
| Tpringle | >VAOP.anoCar        | C-type | Chordata | Anolis        | carolinensis | lizard     | XP_003218607 |
| UMBC     | >VAOP.Astbur        | C-type | Chordata | Astatotilapia | burtoni      | tilapia    | EU523854     |
| UMBC     | >VAOP.Caraur        | C-type | Chordata | Carassius     | auratus      | goldfish   | AB383149     |
| UMBC     | >VAOP.Cypcar        | C-type | Chordata | Cyprinus      | carpio       | carp       | AF233520     |
| Tpringle | >VAOP.danRer        | C-type | Chordata | Danio         | rerio        | zebrafish  | NM_131586    |
| UMBC     | >VAOP.Danrer.valopb | C-type | Chordata | Danio         | rerio        | zebrafish  | AY996588     |
| Tpringle | >VAOP.galGal        | C-type | Chordata | Gallus        | gallus       | chicken    | ABM66817.2   |
| UMBC     | >VAOP.Orylat        | C-type | Chordata | Oryzias       | latipes      | medaka     | NM_001136515 |

|          |                  |        |          |              |              |             |                |
|----------|------------------|--------|----------|--------------|--------------|-------------|----------------|
| Tpringle | >VAOP.petMar     | C-type | Chordata | Petromyzon   | marinus      | lamprey     | U90667         |
| UMBC     | >VAOP.Plealt.val | C-type | Chordata | Plecoglossus | altivelis    | smelt       | AB074483       |
| Tpringle | >VAOP.rutRut     | C-type | Chordata | Rutilus      | rutilus      | minnow      | AY116411       |
| UMBC     | >VAOP.Salsal     | C-type | Chordata | Salmo        | salar        | salmon      | NM_001123626   |
| Tpringle | >VAOP.taeGut     | C-type | Chordata | Taeniopygia  | guttata      | finch       | Genome         |
| Tpringle | >VAOP.takRub     | C-type | Chordata | Takifugu     | rubripes     | fugu        | Genome         |
| Tpringle | >VAOP.xenTro     | C-type | Chordata | Xenopus      | tropicalis   | frog        | XP_002936846.1 |
| Tpringle | >ENCEPH.anoCar   | C-type | Chordata | Anolis       | carolinensis | lizard      | XP_003215888   |
| Tpringle | >ENCEPH.danRer   | C-type | Chordata | Danio        | rerio        | zebrafish   | NM_001111164   |
| Tpringle | >ENCEPH.galGal   | C-type | Chordata | Gallus       | gallus       | chicken     | XP_426139      |
| Tpringle | >ENCEPH.gasAcu   | C-type | Chordata | Gasterosteus | aculeatus    | stickleback | Genome         |
| Tpringle | >ENCEPH.homSap   | C-type | Chordata | Homo         | sapiens      | human       | NM_014322      |

|          |                 |        |          |               |              |           |                |
|----------|-----------------|--------|----------|---------------|--------------|-----------|----------------|
| Tpringle | >ENCEPH.loxAfr  | C-type | Chordata | Loxodonta     | africana     | elephant  | Genome         |
| Tpringle | >ENCEPH.monDom  | C-type | Chordata | Monodelphis   | domestica    | opossum   | NC_008802.1    |
| Tpringle | >ENCEPH.musMus  | C-type | Chordata | Mus           | musculus     | mouse     | AF140241       |
| Tpringle | >ENCEPH.oryLat  | C-type | Chordata | Oryzias       | latipes      | medaka    | Genome         |
| Tpringle | >ENCEPH.otoGar  | C-type | Chordata | Otolemur      | garnettii    | lemur     | Genome         |
| Tpringle | >ENCEPH.ptvVam  | C-type | Chordata | Pteropus      | vampyrus     | macrobat  | Genome         |
| Tpringle | >ENCEPH.takRub  | C-type | Chordata | Takifugu      | rubripes     | fugu      | Genome         |
| Tpringle | >ENCEPH4.braBel | C-type | Chordata | Branchiostoma | belcheri     | amphioxus | AB050608       |
| Tpringle | >ENCEPH4.braFlo | C-type | Chordata | Branchiostoma | floridae     | amphioxus | AB050608       |
| Tpringle | >TMT.anoCar     | C-type | Chordata | Anolis        | carolinensis | lizard    | Genome         |
| Tpringle | >TMT.danRer     | C-type | Chordata | Danio         | rerio        | zebrafish | NP_001112371.1 |
| Tpringle | >TMT.galGal     | C-type | Chordata | Gallus        | gallus       | chicken   | XM_001234388   |

|          |              |        |          |                 |              |             |              |
|----------|--------------|--------|----------|-----------------|--------------|-------------|--------------|
| Tpringle | >TMT.gasAcu  | C-type | Chordata | Gasterosteus    | aculeatus    | stickleback | Genome       |
| Tpringle | >TMT.macEug  | C-type | Chordata | Macropus        | eugenii      | wallaby     | Genome       |
| Tpringle | >TMT.monDom  | C-type | Chordata | Monodelphis     | domestica    | opossum     | XM_001372110 |
| Tpringle | >TMT.ornAna  | C-type | Chordata | Ornithorhynchus | anatinus     | platypus    | Genome       |
| Tpringle | >TMT.oryLat  | C-type | Chordata | Oryzias         | latipes      | medaka      | DK170580     |
| Tpringle | >TMT.taeGut  | C-type | Chordata | Taeniopygia     | guttata      | finch       | NC_011462.1  |
| Tpringle | >TMT.takRub  | C-type | Chordata | Takifugu        | rubripes     | fugu        | AF349945_1   |
| Tpringle | >TMT.tetNig  | C-type | Chordata | Tetraodon       | nigroviridis | pufferfish  | Genome       |
| Tpringle | >TMT.xenTro  | C-type | Chordata | Xenopus         | tropicalis   | frog        | AL773998     |
| Tpringle | >TMT5.braBel | C-type | Chordata | Branchiostoma   | belcheri     | amphioxus   | AB050609     |
| Tpringle | >TMT5.braFlo | C-type | Chordata | Branchiostoma   | floridae     | amphioxus   | XM_002589165 |
| Tpringle | >TMTa.gasAcu | C-type | Chordata | Gasterosteus    | aculeatus    | stickleback | Genome       |

|          |                |        |               |                    |              |             |              |
|----------|----------------|--------|---------------|--------------------|--------------|-------------|--------------|
| Tpringle | >TMTa.oryLat   | C-type | Chordata      | Oryzias            | latipes      | medaka      | Genome       |
| Tpringle | >TMTa.pimPro   | C-type | Chordata      | Pimephales         | promelas     | minnow      | DT200813     |
| Tpringle | >TMTa.takRub   | C-type | Chordata      | Takifugu           | rubripes     | fugu        | AF402774     |
| Tpringle | >TMTa.tetNig   | C-type | Chordata      | Tetraodon          | nigroviridis | pufferfish  | Genome       |
| Tpringle | >TMTa1.danRer  | C-type | Chordata      | Danio              | rerio        | zebrafish   | NM_001118899 |
| Tpringle | >TMTb.danRer   | C-type | Chordata      | Danio              | rerio        | zebrafish   | CN506730     |
| Tpringle | >TMTb.gasAcu   | C-type | Chordata      | Gasterosteus       | aculeatus    | stickleback | Genome       |
| Tpringle | >TMTb.oryLat   | C-type | Chordata      | Oryzias            | latipes      | medaka      | Genome       |
| Tpringle | >TMTb.takRub   | C-type | Chordata      | Takifugu           | rubripes     | fugu        | Genome       |
| Tpringle | >TMTb.tetNig   | C-type | Chordata      | Tetraodon          | nigroviridis | pufferfish  | Genome       |
| Tpringle | >TMTPIN.stoPur | C-type | Echinodermata | Strongylocentrotus | purpuratus   | sea urchin  | XM_001177470 |
| Tpringle | >TMTy.braFlo   | C-type | Chordata      | Branchiostoma      | floridae     | amphioxus   | FE572481     |

|          |                |        |               |                    |                  |              |                |
|----------|----------------|--------|---------------|--------------------|------------------|--------------|----------------|
| UMBC     | >DIP.Culqui    | C-type | Arthropoda    | Culex              | quinquefasciatus | mosquito     | XM_001864516   |
| Tpringle | >TMT.aedAeg    | C-type | Arthropoda    | Aedes              | aegypti          | mosquito     | XM_001650752   |
| Tpringle | >TMT.apiMel    | C-type | Arthropoda    | Apis               | mellifera        | bee          | NM_001039968   |
| Tpringle | >TMT.culPip    | C-type | Arthropoda    | Culex              | pipiens          | mosquito     | XP_001864551   |
| Tpringle | >TMT.triCas    | C-type | Arthropoda    | Tribolium          | castaneum        | flour beetle | NP_001138950.1 |
| Tpringle | >TMT1.anoGam   | C-type | Arthropoda    | Anopheles          | gambiae          | mosquito     | XM_312503      |
| Tpringle | >TMT2.anoGam   | C-type | Arthropoda    | Anopheles          | gambiae          | mosquito     | XM_312502      |
| Tpringle | >TMTa.dapPul   | C-type | Arthropoda    | Daphnia            | pulex            | water flea   | Genome         |
| Tpringle | >TMTb.dapPul   | C-type | Arthropoda    | Daphnia            | pulex            | water flea   | Genome         |
| Tpringle | >ENCEPH.strPur | C-type | Echinodermata | Strongylocentrotus | purpuratus       | sea urchin   | AAGJ02133080   |
| Tpringle | >TMT1.plaDum   | C-type | Annelida      | Platynereis        | dumerilii        | ragworm      | CT030681       |
| Tpringle | >TMT2.plaDum   | C-type | Annelida      | Platynereis        | dumerilii        | ragworm      | AY692353       |

|      |              |         |          |           |          |           |          |
|------|--------------|---------|----------|-----------|----------|-----------|----------|
| UMBC | >CNID.CropB1 | Cnidops | Cnidaria | Cladonema | radiatum | jellyfish | AB332416 |
| UMBC | >CNID.CropB4 | Cnidops | Cnidaria | Cladonema | radiatum | jellyfish | AB332417 |
| UMBC | >CNID.CropC  | Cnidops | Cnidaria | Cladonema | radiatum | jellyfish | AB332420 |
| UMBC | >CNID.CropD  | Cnidops | Cnidaria | Cladonema | radiatum | jellyfish | AB332422 |
| UMBC | >CNID.CropE  | Cnidops | Cnidaria | Cladonema | radiatum | jellyfish | AB332421 |
| UMBC | >CNID.CropF  | Cnidops | Cnidaria | Cladonema | radiatum | jellyfish | AB332426 |
| UMBC | >CNID.CropG1 | Cnidops | Cnidaria | Cladonema | radiatum | jellyfish | AB332427 |
| UMBC | >CNID.CropH  | Cnidops | Cnidaria | Cladonema | radiatum | jellyfish | AB332423 |
| UMBC | >CNID.CropI  | Cnidops | Cnidaria | Cladonema | radiatum | jellyfish | AB332424 |
| UMBC | >CNID.CropJ  | Cnidops | Cnidaria | Cladonema | radiatum | jellyfish | AB332433 |
| UMBC | >CNID.CropK1 | Cnidops | Cnidaria | Cladonema | radiatum | jellyfish | AB332431 |
| UMBC | >CNID.CropK2 | Cnidops | Cnidaria | Cladonema | radiatum | jellyfish | AB332432 |

|          |                 |         |          |            |                |           |              |
|----------|-----------------|---------|----------|------------|----------------|-----------|--------------|
| UMBC     | >CNID.CropL     | Cnidops | Cnidaria | Cladonema  | radiatum       | jellyfish | AB332425     |
| UMBC     | >CNID.CropM     | Cnidops | Cnidaria | Cladonema  | radiatum       | jellyfish | AB332418     |
| UMBC     | >CNID.CropN1    | Cnidops | Cnidaria | Cladonema  | radiatum       | jellyfish | AB332429     |
| UMBC     | >CNID.CropO     | Cnidops | Cnidaria | Cladonema  | radiatum       | jellyfish | AB332419     |
| UMBC     | >CNID.PcopB (2) | Cnidops | Cnidaria | Podocoryna | carnea         | hydrozoan | AB332434     |
| UMBC     | >CNID.PcopC (1) | Cnidops | Cnidaria | Podocoryna | carnea         | hydrozoan | AB332435     |
| Tpringle | >CNOPa1.hydMag  | Cnidops | Cnidaria | Hydra      | magnipapillata | hydra     | ACZU01000679 |
| Tpringle | >CNOPa2.hydMag  | Cnidops | Cnidaria | Hydra      | magnipapillata | hydra     | ACZU01004988 |
| Tpringle | >CNOPa3.hydMag  | Cnidops | Cnidaria | Hydra      | magnipapillata | hydra     | ACZU01055709 |
| Tpringle | >CNOPa4.hydMag  | Cnidops | Cnidaria | Hydra      | magnipapillata | hydra     | ACZU01004994 |
| Tpringle | >CNOPa5.hydMag  | Cnidops | Cnidaria | Hydra      | magnipapillata | hydra     | ACZU01004993 |
| Tpringle | >CNOPa6.hydMag  | Cnidops | Cnidaria | Hydra      | magnipapillata | hydra     | ACZU01000199 |



|          |                |         |          |       |                |       |              |
|----------|----------------|---------|----------|-------|----------------|-------|--------------|
| Tpringle | >CNOPb1.hydMag | Cnidops | Cnidaria | Hydra | magnipapillata | hydra | ACZU01027146 |
| Tpringle | >CNOPb2.hydMag | Cnidops | Cnidaria | Hydra | magnipapillata | hydra | ACZU01051946 |
| Tpringle | >CNOPb3.hydMag | Cnidops | Cnidaria | Hydra | magnipapillata | hydra | ACZU01043783 |
| Tpringle | >CNOPb4.hydMag | Cnidops | Cnidaria | Hydra | magnipapillata | hydra | ACZU01065240 |
| Tpringle | >CNOPb5.hydMag | Cnidops | Cnidaria | Hydra | magnipapillata | hydra | ACZU01078635 |
| Tpringle | >CNOPc1.hydMag | Cnidops | Cnidaria | Hydra | magnipapillata | hydra | ACZU01005587 |
| Tpringle | >CNOPc2.hydMag | Cnidops | Cnidaria | Hydra | magnipapillata | hydra | ACZU01005585 |
| Tpringle | >CNOPc3.hydMag | Cnidops | Cnidaria | Hydra | magnipapillata | hydra | ACZU01005579 |
| Tpringle | >CNOPd1.hydMag | Cnidops | Cnidaria | Hydra | magnipapillata | hydra | ACZU01091217 |
| Tpringle | >CNOPd2.hydMag | Cnidops | Cnidaria | Hydra | magnipapillata | hydra | ACZU01027487 |
| Tpringle | >CNOPd3.hydMag | Cnidops | Cnidaria | Hydra | magnipapillata | hydra | ACZU01075622 |
| Tpringle | >CNOPd4.hydMag | Cnidops | Cnidaria | Hydra | magnipapillata | hydra | ACZU01076129 |

|          |                |         |          |       |                |       |              |
|----------|----------------|---------|----------|-------|----------------|-------|--------------|
| Tpringle | >CNOPd5.hydMag | Cnidops | Cnidaria | Hydra | magnipapillata | hydra | ACZU01038272 |
| Tpringle | >CNOPd6.hydMag | Cnidops | Cnidaria | Hydra | magnipapillata | hydra | ACZU01049360 |
| Tpringle | >CNOPd7.hydMag | Cnidops | Cnidaria | Hydra | magnipapillata | hydra | ACZU01040368 |
| Tpringle | >CNOPe1.hydMag | Cnidops | Cnidaria | Hydra | magnipapillata | hydra | ACZU01068872 |
| Tpringle | >CNOPe2.hydMag | Cnidops | Cnidaria | Hydra | magnipapillata | hydra | ACZU01085554 |
| Tpringle | >CNOPe3.hydMag | Cnidops | Cnidaria | Hydra | magnipapillata | hydra | ACZU01057385 |
| Tpringle | >CNOPe4.hydMag | Cnidops | Cnidaria | Hydra | magnipapillata | hydra | ACZU01037497 |
| Tpringle | >CNOPe5.hydMag | Cnidops | Cnidaria | Hydra | magnipapillata | hydra | ACZU01037501 |
| Tpringle | >CNOPe6.hydMag | Cnidops | Cnidaria | Hydra | magnipapillata | hydra | ACZU01013912 |
| Tpringle | >CNOPf1.hydMag | Cnidops | Cnidaria | Hydra | magnipapillata | hydra | ACZU01095006 |
| Tpringle | >CNOPf2.hydMag | Cnidops | Cnidaria | Hydra | magnipapillata | hydra | ACZU01063269 |
| Tpringle | >CNOPf3.hydMag | Cnidops | Cnidaria | Hydra | magnipapillata | hydra | ACZU01063264 |

|          |                |         |               |                    |                |            |              |
|----------|----------------|---------|---------------|--------------------|----------------|------------|--------------|
| Tpringle | >CNOPf4.hydMag | Cnidops | Cnidaria      | Hydra              | magnipapillata | hydra      | ACZU01049000 |
| Tpringle | >CNOPg1.hydMag | Cnidops | Cnidaria      | Hydra              | magnipapillata | hydra      | ACZU01024987 |
| Tpringle | >CNOPg2.hydMag | Cnidops | Cnidaria      | Hydra              | magnipapillata | hydra      | ACZU01083619 |
| Tpringle | >CNOPg3.hydMag | Cnidops | Cnidaria      | Hydra              | magnipapillata | hydra      | ACZU01007423 |
| Tpringle | >CNOPg4.hydMag | Cnidops | Cnidaria      | Hydra              | magnipapillata | hydra      | ACZU01103264 |
| Tpringle | >CNOPg5.hydMag | Cnidops | Cnidaria      | Hydra              | magnipapillata | hydra      | ACZU01014309 |
| Tpringle | >CNOPg6.hydMag | Cnidops | Cnidaria      | Hydra              | magnipapillata | hydra      | ACZU01086515 |
| Tpringle | >CNOPh1.hydMag | Cnidops | Cnidaria      | Hydra              | magnipapillata | hydra      | ACZU01018050 |
| Tpringle | >CNOPh2.hydMag | Cnidops | Cnidaria      | Hydra              | magnipapillata | hydra      | ACZU01085207 |
| Tpringle | >CNOPh3.hydMag | Cnidops | Cnidaria      | Hydra              | magnipapillata | hydra      | ACZU01011197 |
| Tpringle | >CNOPh4.hydMag | Cnidops | Cnidaria      | Hydra              | magnipapillata | hydra      | ACZU01090363 |
| Tpringle | >NEUR.strPur   | Group 4 | Echinodermata | Strongylocentrotus | purpuratus     | sea urchin | XM_001197837 |

|          |                |         |          |                 |              |           |                |
|----------|----------------|---------|----------|-----------------|--------------|-----------|----------------|
| Tpringle | >NEUR1.bosTau  | Group 4 | Chordata | Bos             | taurus       | cow       | XP_615467      |
| Tpringle | >NEUR1.calJac  | Group 4 | Chordata | Callithrix      | jacchus      | marmoset  | XP_002746669   |
| Tpringle | >NEUR1.canFam  | Group 4 | Chordata | Canis           | familiaris   | dog       | Genome         |
| Tpringle | >NEUR1.dasNov  | Group 4 | Chordata | Dasyus          | novemcinctus | armadillo | Genome         |
| Tpringle | >NEUR1.galGal  | Group 4 | Chordata | Gallus          | gallus       | chicken   | NP_001124215   |
| Tpringle | >NEUR1.homSap  | Group 4 | Chordata | Homo            | sapiens      | human     | NP_859528      |
| Tpringle | >NEUR1.loxAfr  | Group 4 | Chordata | Loxodonta       | africana     | elephant  | Genome         |
| Tpringle | >NEUR1.monDom  | Group 4 | Chordata | Monodelphis     | domesticus   | opossum   | XP_001369202   |
| Tpringle | >NEUR1.musMus  | Group 4 | Chordata | Mus             | musculus     | mouse     | NP_861418      |
| Tpringle | >NEUR1.ornAna  | Group 4 | Chordata | Ornithorhynchus | anatinus     | platypus  | XP_001511991.1 |
| Tpringle | >NEUR1.xenTro  | Group 4 | Chordata | Xenopus         | tropicalis   | frog      | Genome         |
| Tpringle | >NEUR1a.braFlo | Group 4 | Chordata | Branchiostoma   | floridae     | amphioxus | FE548698       |

|          |                |         |          |               |              |            |              |
|----------|----------------|---------|----------|---------------|--------------|------------|--------------|
| Tpringle | >NEUR1b.braFlo | Group 4 | Chordata | Branchiostoma | floridae     | amphioxus  | XM_002202511 |
| Tpringle | >NEUR2.anoCar  | Group 4 | Chordata | Anolis        | carolinensis | lizard     | Genome       |
| Tpringle | >NEUR2.danRer  | Group 4 | Chordata | Danio         | rerio        | zebrafish  | Genome       |
| Tpringle | >NEUR2.galGal  | Group 4 | Chordata | Gallus        | gallus       | chicken    | AB368181     |
| Tpringle | >NEUR2.xenTro  | Group 4 | Chordata | Xenopus       | tropicalis   | frog       | Genome       |
| Tpringle | >NEUR3.anoCar  | Group 4 | Chordata | Anolis        | carolinensis | lizard     | AAWZ01001057 |
| Tpringle | >NEUR3.galGal  | Group 4 | Chordata | Gallus        | gallus       | chicken    | AB368183     |
| Tpringle | >NEUR3.taeGut  | Group 4 | Chordata | Taeniopygia   | guttata      | finch      | ABQF01025032 |
| Tpringle | >NEUR3.xenTro  | Group 4 | Chordata | Xenopus       | tropicalis   | frog       | Genome       |
| Tpringle | >NEUR3a.danRer | Group 4 | Chordata | Danio         | rerio        | zebrafish  | Genome       |
| Tpringle | >NEUR3a.tetNig | Group 4 | Chordata | Tetraodon     | nigroviridis | pufferfish | Genome       |
| Tpringle | >NEUR3b.danRer | Group 4 | Chordata | Danio         | rerio        | zebrafish  | Genome       |

|          |               |         |          |                 |              |               |              |
|----------|---------------|---------|----------|-----------------|--------------|---------------|--------------|
| Tpringle | >NEUR4.anocar | Group 4 | Chordata | Anolis          | carolinensis | lizard        | Genome       |
| Tpringle | >NEUR4.danRer | Group 4 | Chordata | Danio           | erio         | zebrafish     | Genome       |
| Tpringle | >NEUR4.galGal | Group 4 | Chordata | Gallus          | gallus       | chicken       | Genome       |
| Tpringle | >NEUR4.gasAcu | Group 4 | Chordata | Gasterosteus    | aculeatus    | stickleback   | Genome       |
| Tpringle | >NEUR4.ornAna | Group 4 | Chordata | Ornithorhynchus | anatinus     | platypus      | XP_001508178 |
| Tpringle | >NEUR4.tetNig | Group 4 | Chordata | Tetraodon       | nigroviridis | pufferfish    | Genome       |
| Tpringle | >NEUR4.xenTro | Group 4 | Chordata | Xenopus         | tropicalis   | frog          | Genome       |
| UMBC     | >OPS5.Equcab  | Group 4 | Chordata | Equus           | caballus     | horse         | XP_001502825 |
| UMBC     | >OPS5.Macmul  | Group 4 | Chordata | Macaca          | mulatta      | rhesus monkey | XP_001103952 |
| UMBC     | >OPS5.tetnig  | Group 4 | Chordata | Tetraodon       | nigroviridis | pufferfish    | CAG13006     |
| Tpringle | >PER1.braBel  | Group 4 | Chordata | Branchiostoma   | belcheri     | amphioxus     | AB050610     |
| Tpringle | >PER1.braFlo  | Group 4 | Chordata | Branchiostoma   | floridae     | amphioxus     | AB050606     |

|          |               |         |              |               |             |             |              |
|----------|---------------|---------|--------------|---------------|-------------|-------------|--------------|
| Tpringle | >PER2.braBel  | Group 4 | Chordata     | Branchiostoma | belcheri    | amphioxus   | AB050607     |
| Tpringle | >PER2.braFlo  | Group 4 | Chordata     | Branchiostoma | floridae    | amphioxus   | AB050607     |
| Tpringle | >PER1.aplCal  | Group 4 | Mollusca     | Aplysia       | californica | sea slug    | EB338056     |
| Tpringle | >PER1.lotGig  | Group 4 | Mollusca     | Lottia        | gigantea    | limpet      | Genome       |
| Tpringle | >PER1a.sacKol | Group 4 | Hemichordata | Saccoglossus  | kowalevskii | acornworm   | ACQM01133041 |
| UMBC     | >RGR.Bostau   | Group 4 | Chordata     | Bos           | taurus      | cow         | NP_786969    |
| UMBC     | >RGR.Danrer   | Group 4 | Chordata     | Danio         | rerio       | zebrafish   | Q567Y2       |
| UMBC     | >RGR.Musmus   | Group 4 | Chordata     | Mus           | musculus    | mouse       | NP_067315    |
| UMBC     | >RGR.Ratnor   | Group 4 | Chordata     | Rattus        | norvegicus  | rat         | NP_001100769 |
| Tpringle | >RGR1.galGal  | Group 4 | Chordata     | Gallus        | gallus      | chicken     | NM_001031216 |
| Tpringle | >RGR1.gasAcu  | Group 4 | Chordata     | Gasterosteus  | aculeatus   | stickleback | Genome       |
| Tpringle | >RGR1.homSap  | Group 4 | Chordata     | Homo          | sapiens     | human       | NM_001012720 |

|          |              |         |          |                 |              |             |              |
|----------|--------------|---------|----------|-----------------|--------------|-------------|--------------|
| Tpringle | >RGR1.xenTro | Group 4 | Chordata | Xenopus         | tropicalis   | frog        | BC135113     |
| Tpringle | >RGR2.danRer | Group 4 | Chordata | Danio           | rerio        | zebrafish   | NM_001024436 |
| Tpringle | >RGR2.gasAcu | Group 4 | Chordata | Gasterosteus    | aculeatus    | stickleback | Genome       |
| Tpringle | >RGR2.oryLat | Group 4 | Chordata | Oryzias         | latipes      | medaka      | Genome       |
| Tpringle | >RGR2.pimPro | Group 4 | Chordata | Pimephales      | promelas     | minnow      | EST library  |
| Tpringle | >RGR2.tetNig | Group 4 | Chordata | Tetraodon       | nigroviridis | pufferfish  | Genome       |
| UMBC     | >PER.Bostau  | Group 4 | Chordata | Bos             | taurus       | cow         | NP_001179153 |
| UMBC     | >PER.Canfam  | Group 4 | Chordata | Canis           | familiaris   | dog         | XP_853139    |
| Tpringle | >PER1.gasAcu | Group 4 | Chordata | Gasterosteus    | aculeatus    | stickleback | Genome       |
| Tpringle | >PER1.homSap | Group 4 | Chordata | Homo            | sapiens      | human       | NM_006583    |
| Tpringle | >PER1.monDom | Group 4 | Chordata | Monodelphis     | domestica    | opossum     | Genome       |
| Tpringle | >PER1.ornAna | Group 4 | Chordata | Ornithorhynchus | anatinus     | platypus    | XM_001506377 |



|          |              |         |            |               |               |                   |                |
|----------|--------------|---------|------------|---------------|---------------|-------------------|----------------|
| Tpringle | >PER1.xenTro | Group 4 | Chordata   | Xenopus       | tropicalis    | frog              | Genome         |
| Tpringle | >PER3.braBel | Group 4 | Chordata   | Branchiostoma | belcheri      | amphioxus         | AB050606       |
| Tpringle | >PER3.braFlo | Group 4 | Chordata   | Branchiostoma | floridae      | amphioxus         | AB050610       |
| UMBC     | >RRH.Danrer  | Group 4 | Chordata   | Danio         | rerio         | zebrafish         | NP_001004654.1 |
| UMBC     | >RRH.Galgal  | Group 4 | Chordata   | Gallus        | gallus        | chicken           | NP_001073227.1 |
| UMBC     | >RRH.Musmus  | Group 4 | Chordata   | Mus           | musculus      | mouse             | NP_033128.1    |
| Tpringle | >BCR.limPol  | R-type  | Arthropoda | Limulus       | polyphemus    | horseshoe<br>crab | ACO05013       |
| Tpringle | >BCR.triGra  | R-type  | Arthropoda | Triops        | granarius     | tadpole<br>shrimp | BAG80976       |
| Tpringle | >BCR1.triGra | R-type  | Arthropoda | Triops        | granarius     | tadpole<br>shrimp | BAG80979       |
| Tpringle | >BCR1.triLon | R-type  | Arthropoda | Triops        | longicaudatus | tadpole<br>shrimp | BAG80982       |
| Tpringle | >BCR2.braKug | R-type  | Arthropoda | Branchinella  | kugenumaensis | fairy shrimp      | BAG80986       |
| Tpringle | >BCR2.triGra | R-type  | Arthropoda | Triops        | granarius     | tadpole<br>shrimp | BAG80977       |

|          |                   |        |            |                 |                |                |                |
|----------|-------------------|--------|------------|-----------------|----------------|----------------|----------------|
| Tpringle | >BCR2.triLon      | R-type | Arthropoda | Triops          | longicaudatus  | tadpole shrimp | BAG80981       |
| Tpringle | >BCR3.braKug      | R-type | Arthropoda | Branchinella    | kugenumaensis  | fairy shrimp   | BAG80985       |
| Tpringle | >BCR3.triGra      | R-type | Arthropoda | Triops          | granarius      | tadpole shrimp | BAG80980       |
| Tpringle | >BCRa.hemSan      | R-type | Arthropoda | Hemigrapsus     | sanguineus     | crab           | D50583.1       |
| Tpringle | >BCRb.hemSan      | R-type | Arthropoda | Hemigrapsus     | sanguineus     | crab           | D50584.1       |
| UMBC     | >CRUST.Neooer.Rh2 | R-type | Arthropoda | Neogonodactylus | oerstedii      | stomatopod     | DQ646870       |
| UMBC     | >DIP.Bacdor       | R-type | Arthropoda | Bactrocera      | dorsalis       | fruitfly       | AAS88872       |
| UMBC     | >DIP.Cery         | R-type | Arthropoda | Calliphora      | erythrocephala | blowfly        | 156511         |
| UMBC     | >DIP.Drepse.RH1   | R-type | Arthropoda | Drosophila      | pseudoobscura  | fruitfly       | 9077           |
| UMBC     | >DIP.Dropse.RH2   | R-type | Arthropoda | Drosophila      | pseudoobscura  | fruitfly       | 9079           |
| UMBC     | >DIP.Dropse.RH3   | R-type | Arthropoda | Drosophila      | pseudoobscura  | fruitfly       | CAA46710       |
| Tpringle | >LMS.acyPis       | R-type | Arthropoda | Acyrtosiphon    | pisum          | pea aphid      | XP_001947730.1 |

|          |              |        |            |                 |            |                   |                |
|----------|--------------|--------|------------|-----------------|------------|-------------------|----------------|
| Tpringle | >LMS.anoGam  | R-type | Arthropoda | Anopheles       | gambiae    | mosquito          | CAA76825.1     |
| Tpringle | >LMS.homCoa  | R-type | Arthropoda | Homalodisca     | coagulata  | sharpshooter      | AY588065       |
| Tpringle | >LMS.ixoSca  | R-type | Arthropoda | Ixodes          | scapularis | tick              | XM_002408275.1 |
| Tpringle | >LMS.limPol  | R-type | Arthropoda | Limulus         | polyphemus | horseshoe<br>crab | AAA02498.1     |
| Tpringle | >LMS.lucCru  | R-type | Arthropoda | Luciola         | cruciata   | firefly           | BAH56227.1     |
| Tpringle | >LMS.manSex  | R-type | Arthropoda | Manduca         | sexta      | moth              | AAD11964.1     |
| Tpringle | >LMS.meoOer  | R-type | Arthropoda | Neogonodactylus | oerstedii  | stomatopod        | DQ646869       |
| Tpringle | >LMS.papXut  | R-type | Arthropoda | Papilio         | xuthus     | butterfly         | AB028218       |
| Tpringle | >LMS.schGre  | R-type | Arthropoda | Schistocerca    | gregaria   | locust            | CAA56377       |
| Tpringle | >LMS.triCas  | R-type | Arthropoda | Tribolium       | castaneum  | flour beetle      | ABA00706.1     |
| Tpringle | >LMS1.hasAda | R-type | Arthropoda | Hasarius        | adansoni   | jumping<br>spider | BAG14330.1     |
| Tpringle | >LMS1.plePay | R-type | Arthropoda | Plexippus       | paykulli   | jumping<br>spider | BAG14333.1     |

|          |                 |        |            |              |              |                |                |
|----------|-----------------|--------|------------|--------------|--------------|----------------|----------------|
| Tpringle | >LMS2.droMel    | R-type | Arthropoda | Drosophila   | melanogaster | fruitfly       | AAA28734.1     |
| Tpringle | >LMS2.hasAda    | R-type | Arthropoda | Hasarius     | adansoni     | jumping spider | BAG14331.1     |
| UMBC     | >LMS2.Limpol    | R-type | Arthropoda | Limulus      | polyphemus   | horseshoe crab | P35361         |
| Tpringle | >LMS2.plePay    | R-type | Arthropoda | Plexippus    | paykulli     | jumping spider | BAG14334.1     |
| Tpringle | >LMS6.droMel    | R-type | Arthropoda | Drosophila   | melanogaster | fruitfly       | CAB06821.1     |
| Tpringle | >LMSa.apiMel    | R-type | Arthropoda | Apis         | mellifera    | bee            | NM_001077825   |
| Tpringle | >LMSa.nasVit    | R-type | Arthropoda | Nasonia      | vitripennis  | jewel wasp     | NM_001170908.1 |
| Tpringle | >LMSb.apiMel    | R-type | Arthropoda | Apis         | mellifera    | bee            | U26026         |
| Tpringle | >LMSb.nasVit    | R-type | Arthropoda | Nasonia      | vitripennis  | jewel wasp     | NM_001170908.1 |
| UMBC     | >LWS.Acypis     | R-type | Arthropoda | Acyrtosiphon | pisum        | pea aphid      | 187892212      |
| UMBC     | >LWS.Apicer     | R-type | Arthropoda | Apis         | cerana       | bee            | 219566008      |
| UMBC     | >LWS.Apomor.Rh1 | R-type | Arthropoda | Apodemia     | mormo        | butterfly      | 50981744       |

|      |                  |        |            |             |              |             |            |
|------|------------------|--------|------------|-------------|--------------|-------------|------------|
| UMBC | >LWS.Apomor.Rh2  | R-type | Arthropoda | Apodemia    | mormo        | butterfly   | 50981746   |
| UMBC | >LWS.Athros      | R-type | Arthropoda | Athalia     | rosae        | sawfly      | 188593534  |
| UMBC | >LWS.Bicany      | R-type | Arthropoda | Bicyclus    | anynana      | butterfly   | 157502893  |
| UMBC | >LWS.Bommor.EO   | R-type | Arthropoda | Bombyx      | mori         | silkworm    | 112983528  |
| UMBC | >LWS.Camllud     | R-type | Arthropoda | Cambarus    | ludovicianus | crayfish    | CK991518.1 |
| UMBC | >LWS.Catbom      | R-type | Arthropoda | Cataglyphis | bombycinus   | ant         | AF042787.1 |
| UMBC | >LWS.Colphil     | R-type | Arthropoda | Colias      | philodice    | butterfly   | 62860651   |
| UMBC | >LWS.Geoutr      | R-type | Arthropoda | Geoica      | utricularia  | aphid       | 219920848  |
| UMBC | >LWS.Helera      | R-type | Arthropoda | Heliconius  | erato        | butterfly   | 62860665   |
| UMBC | >LWS.Limart      | R-type | Arthropoda | Limenitis   | arthemis     | butterfly   | 62860657   |
| UMBC | >LWS.Lycriub.Rh1 | R-type | Arthropoda | Lycaena     | rubidus      | butterfly   | 50981732   |
| UMBC | >LWS.Megvic      | R-type | Arthropoda | Megoura     | viciae       | vetch aphid | AF189714   |

|      |                 |        |            |               |            |                   |              |
|------|-----------------|--------|------------|---------------|------------|-------------------|--------------|
| UMBC | >LWS.Minabi     | R-type | Arthropoda | Mindarus      | abietinus  | aphid             | 219920842    |
| UMBC | >LWS.Myrlow     | R-type | Arthropoda | Myrmecia      | loweryi    | ant               | 75755591     |
| UMBC | >LWS.Neorid     | R-type | Arthropoda | Neominois     | ridingsii  | butterfly         | 115490647    |
| UMBC | >LWS.Notmac     | R-type | Arthropoda | Nothomyrmecia | macrops    | ant               | 75755597     |
| UMBC | >LWS.Oenchr     | R-type | Arthropoda | Oeneis        | chryxus    | butterfly         | 115490649    |
| UMBC | >LWS.Pedhum     | R-type | Arthropoda | Pediculus     | humanus    | louse             | AAZO01003609 |
| UMBC | >LWS.Pierap     | R-type | Arthropoda | Pieris        | rapae      | butterfly         | BAD06459     |
| UMBC | >LWS.Polica     | R-type | Arthropoda | Polyommatus   | icarus     | butterfly         | 158512151    |
| UMBC | >LWS.Procla     | R-type | Arthropoda | Procambarus   | clarkii    | crayfish          | S53494       |
| UMBC | >LWS.Schgre.Lo2 | R-type | Arthropoda | Schistocerca  | gregaria   | locust            | CAA56378.1   |
| UMBC | >LWS.Sphodro    | R-type | Arthropoda | Sphodromantis | sp.        | praying<br>mantis | 312514       |
| UMBC | >LWS.Themar     | R-type | Arthropoda | Thermonectus  | marmoratus | diving beetle     | 197259972    |

|      |                |        |            |             |             |             |                |
|------|----------------|--------|------------|-------------|-------------|-------------|----------------|
| UMBC | >LWS.Vancar    | R-type | Arthropoda | Vanessa     | cardui      | butterfly   | 159798088      |
| UMBC | >SWS.AedaegUV1 | R-type | Arthropoda | Aedes       | aegypti     | mosquito    | XP_001662982   |
| UMBC | >SWS.AedaegUV2 | R-type | Arthropoda | Aedes       | aegypti     | mosquito    | XP_001653866.1 |
| UMBC | >SWS.Apicer    | R-type | Arthropoda | Apis        | cerana      | bee         | BAH04515.1     |
| UMBC | >SWS.ApicerUV  | R-type | Arthropoda | Apis        | cerana      | bee         | BAH04514.1     |
| UMBC | >SWS.ApomorB   | R-type | Arthropoda | Apodemia    | mormo       | butterfly   | AAT91643.1     |
| UMBC | >SWS.ApomorUV  | R-type | Arthropoda | Apodemia    | mormo       | butterfly   | AAT91642.1     |
| UMBC | >SWS.BicanyB   | R-type | Arthropoda | Bicyclus    | anyana      | butterfly   | AAV16527.1     |
| UMBC | >SWS.BicanyUV  | R-type | Arthropoda | Bicyclus    | anyana      | butterfly   | AAL91507.1     |
| UMBC | >SWS.BomimpUV  | R-type | Arthropoda | Bombus      | impatiens   | bumble bees | AAV67326.1     |
| UMBC | >SWS.CamabdUV  | R-type | Arthropoda | Camponotus  | abdominalis | ant         | AAC05092.1     |
| UMBC | >SWS.CatbomUV  | R-type | Arthropoda | Cataglyphis | bombycinus  | ant         | AAC05091.1     |

|      |                |        |            |            |                   |           |                |
|------|----------------|--------|------------|------------|-------------------|-----------|----------------|
| UMBC | >SWS.ColphiV   | R-type | Arthropoda | Colias     | philodice         | butterfly | AAAY16532.1    |
| UMBC | >SWS.CulquiUV  | R-type | Arthropoda | Culex      | quinquefasciatus  | mosquito  | XP_001851157.1 |
| UMBC | >SWS.Danple    | R-type | Arthropoda | Danaus     | plexippus         | butterfly | AAU07977.1     |
| UMBC | >SWS.DanplexUV | R-type | Arthropoda | Danaus     | plexippus         | butterfly | AAU07979.1     |
| UMBC | >SWS.Helera    | R-type | Arthropoda | Heliconius | erato             | butterfly | AAAY16539.1    |
| UMBC | >SWS.HeleraUV  | R-type | Arthropoda | Heliconius | erato             | butterfly | AAAY16537.1    |
| UMBC | >SWS.HelmeIB   | R-type | Arthropoda | Heliconius | melpomene         | butterfly | AAAY16530.1    |
| UMBC | >SWS.LimartB   | R-type | Arthropoda | Limenitis  | arthemis astyanax | butterfly | AAAY16535.2    |
| UMBC | >SWS.LycriubB1 | R-type | Arthropoda | Lycaena    | rubidus           | butterfly | AAT91639.1     |
| UMBC | >SWS.LycriubB2 | R-type | Arthropoda | Lycaena    | rubidus           | butterfly | AAT91640.1     |
| UMBC | >SWS.LycriubUV | R-type | Arthropoda | Lycaena    | rubidus           | butterfly | AAT91641.1     |
| UMBC | >SWS.NymantB   | R-type | Arthropoda | Nymphalis  | antiopa           | butterfly | AAAY16526.1    |



|      |                 |        |            |              |            |               |            |
|------|-----------------|--------|------------|--------------|------------|---------------|------------|
| UMBC | >SWS.PapxutB    | R-type | Arthropoda | Papilio      | xuthus     | butterfly     | BAA93469.1 |
| UMBC | >SWS.Pierap     | R-type | Arthropoda | Pieris       | rapae      | butterfly     | BAE19945.1 |
| UMBC | >SWS.PleglaB1   | R-type | Arthropoda | Plebejus     | glandon    | butterfly     | ABD64152.1 |
| UMBC | >SWS.PleglaB2   | R-type | Arthropoda | Plebejus     | glandon    | butterfly     | ABD64153.1 |
| UMBC | >SWS.PolicaB1   | R-type | Arthropoda | Polyommatus  | icarus     | butterfly     | ABD64150.1 |
| UMBC | >SWS.PolicaB2   | R-type | Arthropoda | Polyommatus  | icarus     | butterfly     | ABD64151.1 |
| UMBC | >SWS.PolicaUV   | R-type | Arthropoda | Polyommatus  | icarus     | butterfly     | ABW69111.1 |
| UMBC | >SWS.SatbehB1   | R-type | Arthropoda | Satyrium     | behrii     | butterfly     | ABD64148.1 |
| UMBC | >SWS.SatbehB2   | R-type | Arthropoda | Satyrium     | behrii     | butterfly     | ABD64149.1 |
| UMBC | >SWS.ThemarUVI  | R-type | Arthropoda | Thermonectus | marmoratus | diving beetle | ACH56537.1 |
| UMBC | >SWS.ThemarUVII | R-type | Arthropoda | Thermonectus | marmoratus | diving beetle | ACH56538.1 |
| UMBC | >SWS.VancarB    | R-type | Arthropoda | Vanessa      | cardui     | butterfly     | AAP49026.2 |

|          |               |        |            |              |                |                |              |
|----------|---------------|--------|------------|--------------|----------------|----------------|--------------|
| UMBC     | >SWS.VancarUV | R-type | Arthropoda | Vanessa      | cardui         | butterfly      | AAP49025.2   |
| Tpringle | >UV3.droMel   | R-type | Arthropoda | Drosophila   | melanogaster   | fruitfly       | AAA28854.1   |
| Tpringle | >UV5.anoGam   | R-type | Arthropoda | Anopheles    | gambiae        | mosquito       | XP_001688790 |
| Tpringle | >UV5.apiMel   | R-type | Arthropoda | Apis         | mellifera      | bee            | AAC13418     |
| Tpringle | >UV5.braKug   | R-type | Arthropoda | Branchinella | kugenumaensis  | fairy shrimp   | BAG80984     |
| Tpringle | >UV5.diaNig   | R-type | Arthropoda | Dianemobius  | nigrofasciatus | cricket        | BAG71429     |
| Tpringle | >UV5.hasAda   | R-type | Arthropoda | Hasarius     | adansoni       | jumping spider | BAG14332.1   |
| Tpringle | >UV5.lucCru   | R-type | Arthropoda | Luciola      | cruciata       | firefly        | BAH56228     |
| Tpringle | >UV5.manSex   | R-type | Arthropoda | Manduca      | sexta          | moth           | AAD11965.1   |
| Tpringle | >UV5.papXut   | R-type | Arthropoda | Papilio      | xuthus         | butterfly      | BAA93470     |
| Tpringle | >UV5.plePay   | R-type | Arthropoda | Plexippus    | paykulli       | jumping spider | BAG14335     |
| Tpringle | >UV5.rhoPro   | R-type | Arthropoda | Rhodnius     | prolixus       | kissing bug    | Genome       |

|          |              |        |            |            |                  |                |                |
|----------|--------------|--------|------------|------------|------------------|----------------|----------------|
| Tpringle | >UV5.triGra  | R-type | Arthropoda | Triops     | granarius        | tadpole shrimp | BAG80978       |
| Tpringle | >UV5.triLon  | R-type | Arthropoda | Triops     | longicaudatus    | tadpole shrimp | BAG80983       |
| Tpringle | >UV5B.droMel | R-type | Arthropoda | Drosophila | melanogaster     | fruitfly       | AAC47426.1     |
| Tpringle | >UV7.aedAeg  | R-type | Arthropoda | Aedes      | aegypti          | mosquito       | XM_001650694   |
| Tpringle | >UV7.anoGam  | R-type | Arthropoda | Anopheles  | gambiae          | mosquito       | XP_308329      |
| Tpringle | >UV7.culQui  | R-type | Arthropoda | Culex      | quinquefasciatus | mosquito       | XM_001861603   |
| Tpringle | >UV7.droAna  | R-type | Arthropoda | Drosophila | ananassae        | fruitfly       | XP_001956024   |
| Tpringle | >UV7.droMel  | R-type | Arthropoda | Drosophila | melanogaster     | fruitfly       | NP_524035      |
| Tpringle | >UV7.droMoj  | R-type | Arthropoda | Drosophila | mojavensis       | fruitfly       | XP_002007363.1 |
| Tpringle | >UV7.droPse  | R-type | Arthropoda | Drosophila | pseudoobscura    | fruitfly       | XP_002134833   |
| Tpringle | >UV7.droWil  | R-type | Arthropoda | Drosophila | willistoni       | fruitfly       | XP_002068301.1 |
| Tpringle | >UV7.droYak  | R-type | Arthropoda | Drosophila | yakuba           | fruitfly       | XP_002094554   |

|          |              |        |            |              |                |             |                |
|----------|--------------|--------|------------|--------------|----------------|-------------|----------------|
| Tpringle | >UV7.pedHum  | R-type | Arthropoda | Pediculus    | humanus        | louse       | AAZO01007270   |
| Tpringle | >UV7.rhoPro  | R-type | Arthropoda | Rhodnius     | prolixus       | kissing bug | Genome         |
| Tpringle | >UV7a.acyPis | R-type | Arthropoda | Acyrtosiphon | pisum          | pea aphid   | XP_001950416.1 |
| Tpringle | >UV7b.acyPis | R-type | Arthropoda | Acyrtosiphon | pisum          | pea aphid   | XP_001944926.1 |
| Tpringle | >UVB.acyPis  | R-type | Arthropoda | Acyrtosiphon | pisum          | pea aphid   | XP_001951588.1 |
| Tpringle | >UVB.anoGam  | R-type | Arthropoda | Anopheles    | gambiae        | mosquito    | XP_319247.1    |
| Tpringle | >UVB.apiMel  | R-type | Arthropoda | Apis         | mellifera      | bee         | AF004168       |
| Tpringle | >UVB.diaNig  | R-type | Arthropoda | Dianemobius  | nigrofasciatus | cricket     | BAF45422       |
| Tpringle | >UVB.manSex  | R-type | Arthropoda | Manduca      | sexta          | moth        | AAD11966.1     |
| Tpringle | >UVB.megVic  | R-type | Arthropoda | Megoura      | viciae         | vetch aphid | AAG17120       |
| Tpringle | >UVB.nasVit  | R-type | Arthropoda | Nasonia      | vitripennis    | jewel wasp  | XP_001604622.1 |
| UMBC     | >CEPH.Acusub | R-type | Mollusca   | Alloteuthis  | subulata       | squid       | Z49108         |

|          |               |        |                 |              |              |                 |                |
|----------|---------------|--------|-----------------|--------------|--------------|-----------------|----------------|
| UMBC     | >CEPH.Eupsco1 | R-type | Mollusca        | Euprymna     | scolopes     | ceph            | ACB05673.1     |
| UMBC     | >CEPH.Eupsco2 | R-type | Mollusca        | Euprymna     | scolopes     | ceph            | ACB05672.1     |
| UMBC     | >CEPH.Lolfor  | R-type | Mollusca        | Loligo       | forbesi      | squid           | CAA40108.1     |
| UMBC     | >CEPH.Lolpea  | R-type | Mollusca        | Loligo       | pealei       | squid           | AY450853       |
| UMBC     | >CEPH.Octdof  | R-type | Mollusca        | Enteroctopus | dofleini     | octopus         | CAA30644.1     |
| Tpringle | >LWS.todPac   | R-type | Mollusca        | Todarodes    | pacificus    | squid           | X70498         |
| Tpringle | >MEL1.capCap  | R-type | Annelida        | Capitella    | capitata     | polychaete worm | Genome         |
| Tpringle | >MEL1.schMan  | R-type | Platyhelminthes | Schistosoma  | mansoni      | trematode worm  | AF155134       |
| Tpringle | >MEL1.schMed  | R-type | Platyhelminthes | Schmidtea    | mediterranea | planaria        | AF112361       |
| Tpringle | >MEL2.schMan  | R-type | Platyhelminthes | Schistosoma  | mansoni      | trematode worm  | CD096414       |
| Tpringle | >MEL1.bosTau  | R-type | Chordata        | Bos          | taurus       | cow             | NP_001179328.1 |
| Tpringle | >MEL1.calJac  | R-type | Chordata        | Callithrix   | jacchus      | marmoset        | Genome         |

|          |               |        |          |               |            |              |                |
|----------|---------------|--------|----------|---------------|------------|--------------|----------------|
| Tpringle | >MEL1.calMil  | R-type | Chordata | Callorhinchus | milii      | elephantfish | Genome         |
| Tpringle | >MEL1.canFam  | R-type | Chordata | Canis         | familiaris | dog          | XP_853735.1    |
| Tpringle | >MEL1.danRer  | R-type | Chordata | Danio         | rerio      | zebrafish    | Genome         |
| Tpringle | >MEL1.danRer2 | R-type | Chordata | Danio         | rerio      | zebrafish    | Genome         |
| Tpringle | >MEL1.equCab  | R-type | Chordata | Equus         | caballus   | horse        | XP_001501116.2 |
| Tpringle | >MEL1.eriEur  | R-type | Chordata | Erinaceus     | europaeus  | hedgehog     | Genome         |
| Tpringle | >MEL1.felCat  | R-type | Chordata | Felis         | catus      | cat          | AY382594       |
| Tpringle | >MEL1.galGal  | R-type | Chordata | Gallus        | gallus     | chicken      | NP_001038118.1 |
| Tpringle | >MEL1.gasAcu  | R-type | Chordata | Gasterosteus  | aculeatus  | stickleback  | Genome         |
| Tpringle | >MEL1.gorGor  | R-type | Chordata | Gorilla       | gorilla    | gorilla      | Genome         |
| Tpringle | >MEL1.homSap  | R-type | Chordata | Homo          | sapiens    | human        | NM_033282      |
| Tpringle | >MEL1.lotGig  | R-type | Mollusca | Lottia        | gigantea   | limpet       | FC774055       |

|          |              |        |          |                 |             |             |          |
|----------|--------------|--------|----------|-----------------|-------------|-------------|----------|
| Tpringle | >MEL1.micMur | R-type | Chordata | Microcebus      | murinus     | mouse lemur | Genome   |
| Tpringle | >MEL1.monDom | R-type | Chordata | Monodelphis     | domestica   | opossum     | Genome   |
| Tpringle | >MEL1.musMus | R-type | Chordata | Mus             | musculus    | mouse       | AF147789 |
| Tpringle | >MEL1.nanEhr | R-type | Chordata | Nannospalax     | ehrenbergi  | molerat     | AM748539 |
| Tpringle | >MEL1.ornAna | R-type | Chordata | Ornithorhynchus | anatinus    | platypus    | Genome   |
| Tpringle | >MEL1.oryLat | R-type | Chordata | Oryzias         | latipes     | medaka      | Genome   |
| Tpringle | >MEL1.otoGar | R-type | Chordata | Otolemur        | garnettii   | lemur       | Genome   |
| Tpringle | >MEL1.panTro | R-type | Chordata | Pan             | troglydytes | chimp       | Genome   |
| Tpringle | >MEL1.patYes | R-type | Mollusca | Patinopecten    | yessoensis  | scallop     | AB006454 |
| Tpringle | >MEL1.petMar | R-type | Chordata | Petromyzon      | marinus     | lamprey     | Genome   |
| Tpringle | >MEL1.phoSun | R-type | Chordata | Phodopus        | sungorus    | hamster     | AY726733 |
| Tpringle | >MEL1.ponAbe | R-type | Chordata | Pongo           | abelii      | orang       | Genome   |

|          |              |        |          |             |               |            |                |
|----------|--------------|--------|----------|-------------|---------------|------------|----------------|
| Tpringle | >MEL1.proCap | R-type | Chordata | Procavia    | capensis      | rock hyrax | Genome         |
| Tpringle | >MEL1.pteVam | R-type | Chordata | Pteropus    | vampyrus      | macrobat   | Genome         |
| Tpringle | >MEL1.ratNor | R-type | Chordata | Rattus      | norvegicus    | rat        | AY072689       |
| Tpringle | >MEL1.rheMac | R-type | Chordata | Rhesus      | macaca        | rhesus     | Genome         |
| Tpringle | >MEL1.sepOff | R-type | Mollusca | Sepia       | officinalis   | cuttlefish | AF000947       |
| Tpringle | >MEL1.smiCra | R-type | Chordata | Sminthopsis | crassicaudata | dunnart    | DQ383281       |
| Tpringle | >MEL1.susScr | R-type | Chordata | Sus         | scrofa        | pig        | Genome         |
| Tpringle | >MEL1.taeGut | R-type | Chordata | Taeniopygia | guttata       | finch      | Genome         |
| Tpringle | >MEL1.takRub | R-type | Chordata | Takifugu    | rubripes      | fugu       | Genome         |
| UMBC     | >MEL1.Xenlae | R-type | Chordata | Xenopus     | laevis        | frog       | ABD37674.1     |
| Tpringle | >MEL1.xenTro | R-type | Chordata | Xenopus     | tropicalis    | frog       | XP_002937616.1 |
| Tpringle | >MEL2.anoCar | R-type | Chordata | Anolis      | carolinensis  | lizard     | Genome         |



|          |                |        |          |               |              |             |              |
|----------|----------------|--------|----------|---------------|--------------|-------------|--------------|
| Tpringle | >MEL2.danRer   | R-type | Chordata | Danio         | rerio        | zebrafish   | Genome       |
| Tpringle | >MEL2.galGal   | R-type | Chordata | Gallus        | gallus       | chicken     | AY882944     |
| Tpringle | >MEL2.gasAcu   | R-type | Chordata | Gasterosteus  | aculeatus    | stickleback | Genome       |
| Tpringle | >MEL2.tetNig   | R-type | Chordata | Tetraodon     | nigroviridis | pufferfish  | Genome       |
| Tpringle | >MEL2.xenLae   | R-type | Chordata | Xenopus       | laevis       | frog        | Genome       |
| Tpringle | >MELmop.braBel | R-type | Chordata | Branchiostoma | belcheri     | amphioxus   | AB205400     |
| Tpringle | >MELmop.braFlo | R-type | Chordata | Branchiostoma | floridae     | amphioxus   | Genome       |
| Tpringle | >MEL1.aplCal   | R-type | Mollusca | Aplysia       | californica  | sea hare    | AASC01108363 |
| Tpringle | >MEL1.cioInt   | R-type | Chordata | Ciona         | intestinalis | tunicate    | AABS01000008 |
| Tpringle | >MEL1.cioSav   | R-type | Chordata | Ciona         | savignyi     | tunicate    | Genome       |
| Tpringle | >MEL2.lotGig   | R-type | Mollusca | Lottia        | gigantea     | limpet      | Genome       |
| Tpringle | >MEL6.braBel   | R-type | Chordata | Branchiostoma | belcheri     | amphioxus   | AB050611     |

|          |              |         |            |               |           |            |                |
|----------|--------------|---------|------------|---------------|-----------|------------|----------------|
| Tpringle | >MEL6.braFlo | R-type  | Chordata   | Branchiostoma | floridae  | amphioxus  | XP_002586119.1 |
| Tpringle | >MEL1.dapPul | R-type  | Arthropoda | Daphnia       | pulex     | water flea | Genome         |
| Gen-Bank | >Nvop1       | Cnidops | Cnidaria   | Nematostella  | vectensis | anemone    | FAA00408.1     |
| Gen-Bank | >Nvop2       | Cnidops | Cnidaria   | Nematostella  | vectensis | anemone    | FAA00400.1     |
| Gen-Bank | >Nvop3       | Cnidops | Cnidaria   | Nematostella  | vectensis | anemone    | FAA00410.1     |
| Gen-Bank | >Nvop4       | Cnidops | Cnidaria   | Nematostella  | vectensis | anemone    | FAA00409.1     |
| Gen-Bank | >Nvop5       | Cnidops | Cnidaria   | Nematostella  | vectensis | anemone    | FAA00407.1     |
| Gen-Bank | >Nvop6       | Cnidops | Cnidaria   | Nematostella  | vectensis | anemone    | FAA00406.1     |
| Gen-Bank | >Nvop7       | Cnidops | Cnidaria   | Nematostella  | vectensis | anemone    | FAA00405.1     |
| Gen-Bank | >Nvop8       | Cnidops | Cnidaria   | Nematostella  | vectensis | anemone    | FAA00404.1     |
| Gen-Bank | >Nvop9       | Cnidops | Cnidaria   | Nematostella  | vectensis | anemone    | FAA00403.1     |
| Gen-Bank | >Nvop11      | Cnidops | Cnidaria   | Nematostella  | vectensis | anemone    | FAA00401.1     |

|          |         |         |          |              |           |         |            |
|----------|---------|---------|----------|--------------|-----------|---------|------------|
| Gen-Bank | >Nvop12 | Cnidops | Cnidaria | Nematostella | vectensis | anemone | FAA00399.1 |
| Gen-Bank | >Nvop13 | Cnidops | Cnidaria | Nematostella | vectensis | anemone | FAA00398.1 |
| Gen-Bank | >Nvop14 | Cnidops | Cnidaria | Nematostella | vectensis | anemone | FAA00397.1 |
| Gen-Bank | >Nvop15 | Cnidops | Cnidaria | Nematostella | vectensis | anemone | FAA00396.1 |
| Gen-Bank | >Nvop17 | Cnidops | Cnidaria | Nematostella | vectensis | anemone | FAA00395.1 |
| Gen-Bank | >Nvop19 | Cnidops | Cnidaria | Nematostella | vectensis | anemone | FAA00412.1 |
| Gen-Bank | >Nvop21 | Cnidops | Cnidaria | Nematostella | vectensis | anemone | FAA00393.1 |
| Gen-Bank | >Nvop22 | Cnidops | Cnidaria | Nematostella | vectensis | anemone | FAA00392.1 |
| Gen-Bank | >Nvop23 | Cnidops | Cnidaria | Nematostella | vectensis | anemone | FAA00391.1 |
| Gen-Bank | >Nvop25 | Cnidops | Cnidaria | Nematostella | vectensis | anemone | FAA00389.1 |
| Gen-Bank | >Nvop26 | Cnidops | Cnidaria | Nematostella | vectensis | anemone | FAA00388.1 |
| Gen-Bank | >Nvop27 | Cnidops | Cnidaria | Nematostella | vectensis | anemone | FAA00387.1 |

|          |         |         |          |              |            |           |            |
|----------|---------|---------|----------|--------------|------------|-----------|------------|
| Gen-Bank | >Nvop28 | Cnidops | Cnidaria | Nematostella | vectensis  | anemone   | FAA00386.1 |
| Gen-Bank | >Nvop29 | Cnidops | Cnidaria | Nematostella | vectensis  | anemone   | FAA00385.1 |
| Gen-Bank | >Nvop30 | Cnidops | Cnidaria | Nematostella | vectensis  | anemone   | FAA00384.1 |
| Gen-Bank | >Nvop31 | Cnidops | Cnidaria | Nematostella | vectensis  | anemone   | FAA00383.1 |
| Tpringle | >Caryb  | Cnidops | Cnidaria | Carybdea     | rastonii   | sea wasp  | BAG80696   |
| Tpringle | >Tcop18 | Cnidops | Cnidaria | Tripedalia   | cystophora | box jelly | EU310498   |
| Gen-Bank | >Tcop1  | Cnidops | Cnidaria | Tripedalia   | cystophora | box jelly | JQ968432   |
| Gen-Bank | >Tcop2  | Cnidops | Cnidaria | Tripedalia   | cystophora | box jelly | JQ968431   |
| Gen-Bank | >Tcop3  | Cnidops | Cnidaria | Tripedalia   | cystophora | box jelly | JQ968430   |
| Gen-Bank | >Tcop4  | Cnidops | Cnidaria | Tripedalia   | cystophora | box jelly | JQ968429   |
| Gen-Bank | >Tcop5  | Cnidops | Cnidaria | Tripedalia   | cystophora | box jelly | JQ968428   |
| Gen-Bank | >Tcop6  | Cnidops | Cnidaria | Tripedalia   | cystophora | box jelly | JQ968427   |

|          |          |         |          |            |            |           |          |
|----------|----------|---------|----------|------------|------------|-----------|----------|
| Gen-Bank | >Tcop7   | Cnidops | Cnidaria | Tripedalia | cystophora | box jelly | JQ968426 |
| Gen-Bank | >Tcop8   | Cnidops | Cnidaria | Tripedalia | cystophora | box jelly | JQ968425 |
| Gen-Bank | >Tcop9   | Cnidops | Cnidaria | Tripedalia | cystophora | box jelly | JQ968424 |
| Gen-Bank | >Tcop10  | Cnidops | Cnidaria | Tripedalia | cystophora | box jelly | JQ968423 |
| Gen-Bank | >Tcop11  | Cnidops | Cnidaria | Tripedalia | cystophora | box jelly | JQ968422 |
| Gen-Bank | >Tcop12  | Cnidops | Cnidaria | Tripedalia | cystophora | box jelly | JQ968421 |
| Gen-Bank | >Tcop13  | Cnidops | Cnidaria | Tripedalia | cystophora | box jelly | JQ968420 |
| Gen-Bank | >Tcop14  | Cnidops | Cnidaria | Tripedalia | cystophora | box jelly | JQ968419 |
| Gen-Bank | >Tcop15  | Cnidops | Cnidaria | Tripedalia | cystophora | box jelly | JQ968418 |
| Gen-Bank | >Tcop16  | Cnidops | Cnidaria | Tripedalia | cystophora | box jelly | JQ968417 |
| Gen-Bank | >Tcop17  | Cnidops | Cnidaria | Tripedalia | cystophora | box jelly | JQ968416 |
| Gen-Bank | >OG.TSHR | TSHR    |          | Homo       | sapiens    | human     | AAB87990 |

|          |            |                                          |  |      |         |       |             |
|----------|------------|------------------------------------------|--|------|---------|-------|-------------|
| Gen-Bank | >OG.ADORA3 | A3 adenosine receptor                    |  | Homo | sapiens | human | AAA16365.1  |
| NCBI     | >OG.TRHR   | TRHR                                     |  | Homo | sapiens | human | NP_003292.1 |
| Gen-Bank | >OG.ADRA1D | alpha-1A-adrenergic receptor             |  | Homo | sapiens | human | AAA35496.1  |
| NCBI     | >OG.GPR161 | G-protein coupled receptor 161 isoform 2 |  | Homo | sapiens | human | NP_722561.1 |
| NCBI     | >OG.PRLHR  | prolactin-releasing peptide receptor     |  | Homo | sapiens | human | NP_004239.1 |
| NCBI     | >OG.NPY1R  | neuropeptide Y receptor type 1           |  | Homo | sapiens | human | NP_000900.1 |
| NCBI     | >OG.PPYR1  | neuropeptide Y receptor type 4           |  | Homo | sapiens | human | NP_005963.3 |
| NCBI     | >OG.GPR19  | G-protein coupled receptor 19            |  | Homo | sapiens | human | NP_006134.1 |
| Gen-Bank | >OG.QRFPR  | QRFPR receptor                           |  | Homo | sapiens | human | BAC98938.1  |
| Gen-Bank | >OG.NMUR2  | neuromedin U receptor 2                  |  | Homo | sapiens | human | AAF82755.1  |
| Gen-Bank | >OG.TACR2  | neurokinin-2 receptor                    |  | Homo | sapiens | human | AAB05897.1  |

|          |             |                                  |  |      |         |       |             |
|----------|-------------|----------------------------------|--|------|---------|-------|-------------|
| Gen-Bank | >OG.HCRTR1  | orexin receptor-1                |  | Homo | sapiens | human | AAC39601.1  |
| NCBI     | >OG.P2RY8   | P2Y purinoceptor 8               |  | Homo | sapiens | human | NP_835230.1 |
| NCBI     | >OG.CYSLTR1 | cysteinyl leukotriene receptor 1 |  | Homo | sapiens | human | NP_006630.1 |
| Gen-Bank | >OG.GPR17   | G protein-coupled receptor 17    |  | Homo | sapiens | human | AEP43758.1  |
| NCBI     | >OG.BDKRB2  | B2 bradykinin receptor           |  | Homo | sapiens | human | NP_000614.1 |
| NCBI     | >OG.CCR4    | C-C chemokine receptor type 4    |  | Homo | sapiens | human | NP_005499.1 |
| Gen-Bank | >OG.GALR1   | galanin receptor                 |  | Homo | sapiens | human | AAC51936.1  |
| Gen-Bank | >OG.OPRM1   | opioid receptor, mu 1            |  | Homo | sapiens | human | CAI20458.1  |
| NCBI     | >OG.OPRL1   | nociceptin receptor              |  | Homo | sapiens | human | NP_000904.1 |
| NCBI     | >OG.SSTR1   | somatostatin receptor type 1     |  | Homo | sapiens | human | NP_001040.1 |

**Table 2 - Dataset sequences**

List of sequences used for phylogenetic analysis.
